# Supplementary material for: Mechanistic implications of an asymmetric intermediate in catalytic C–C coupling by a dinuclear nickel complex
Source: Royal Society of Chemistry journal article supplement (doi:10.1039/c1cc12657a), 2011-01-01
Supplement: c1cc12657a.pdf [file c1cc12657a.pdf]

## Supporting Information:

### Mechanistic Implications of an Asymmetric Intermediate in Catalytic C—C Coupling by a Dinuclear Nickel Complex

Robert Beck and Samuel A. Johnson\*

Department of Chemistry and Biochemistry, University of Windsor  
Sunset Avenue 401, Windsor, ON, N9B 3P4, (Canada)

Fax: (+1) 519-973-7098

E-mail: sjohnson@uwindsor.ca

#### Contents:

- S1 Lewis Structures of  $4^{i\text{-Pr}}$ .
- S2 Comparison of bond lengths to Ni(I) centres in  $3^{i\text{-Pr}}$  and  $4^{i\text{-Pr}}$  with related Ni(I) complexes.
- S3 General Procedures.
- S3 Synthesis of monodeuterated-Biphenylene ( $1-d_1$ ).
- S4 Synthesis of  $4^{i\text{-Pr}}$ .
- S5 Variable Temperature  $^{31}\text{P}\{^1\text{H}\}$  NMR study of  $4^{i\text{-Pr}}$ .
- S7 Synthesis of  $3^{i\text{-Pr}}$ .
- S8 Product Analysis by High resolution Mass Spectra (HRMS).
- S11 Deuterium Labeling Cross-Over Experiment.
- S12 Catalytic Conversion of Biphenylene to Tetraphenylene.
- S12 X-ray Crystallography.
- S13 Calculations.
- S13 Optimized Coordinates and Energies for  $5^{\text{Me}}$  and  $4^{\text{Me}}$ .
- S21 Tables of Crystallographic Data for  $3^{i\text{-Pr}}$ .
- S32 Tables of Crystallographic Data for  $4^{i\text{-Pr}}$ .

#### Lewis Structures of $4^{i\text{-Pr}}$ .

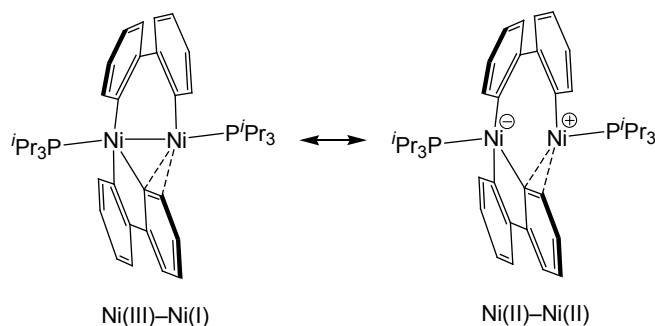

These depictions of  $4^{i\text{-Pr}}$  feature two extremes of electron assignment. The structure on the left displays the electrons in the Ni(III)–Ni(I) bond as covalently shared. The structure on the right shows the extreme limit of polarization of the nickel-nickel bond, where the electrons in this bond are assigned to the anionic nickel centre.

**Table S1.** Comparison of bond lengths to Ni(I) centres in **3<sup>iPr</sup>** and **4<sup>iPr</sup>** with related Ni(I) complexes

| Compound                                                                            | Ni-C $\sigma$ -bond length(s) (Å)        | Short Ni-C $\pi$ -bond length(s) (Å)                | Long Ni-C $\pi$ -bond length(s) (Å) | Reference    |
|-------------------------------------------------------------------------------------|------------------------------------------|-----------------------------------------------------|-------------------------------------|--------------|
| 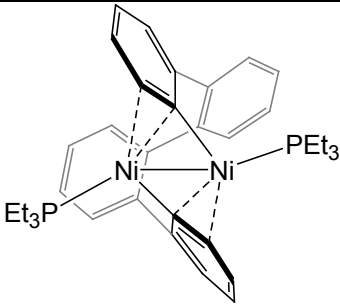   | 1.97(2)<br>1.89(2)<br>1.91(2)<br>1.87(1) | 1.99(1)<br>1.93(1)<br>2.03(2)<br>2.01(2)            | 2.23(2) 2.25(2)<br>2.26(2) 2.27(2)  | <sup>a</sup> |
|    | 1.9154(10)<br>1.9141(10)                 | 1.9852(10)<br>2.0013(10)<br>2.0630(10)<br>2.0589(9) | 2.2964(10)<br>2.2067(10)            | <sup>b</sup> |
|   | 1.929(3)                                 | 2.055(3) Ni-C(1)<br>2.118(3) Ni-C(12)               | 2.234(3)<br>2.300(3)                |              |
| <b>3<sup>iPr</sup></b>                                                              | 1.930(3)<br>1.919(3)                     | 1.970(3)<br>2.006(3)                                | 2.265(3)<br>2.302(3)                | <sup>d</sup> |
| <b>4<sup>iPr</sup></b>                                                              | 1.915(3)                                 | 1.941(3)                                            | 2.388(3)                            | <sup>d</sup> |
|  | 1.935(2)<br>1.918(2)                     | 1.955(2)<br>1.952(2)                                |                                     | <sup>e</sup> |

<sup>a</sup> J. J. Eisch, A. M. Piotrowski, K. I. Han, C. Kruger and Y. H. Tsay, *Organometallics*, 1985, **4**, 224-231; two molecules in asymmetric unit, and relatively large errors in bond lengths. <sup>b</sup> A. Velian, S. Lin, A. J. M. Miller, M. W. Day and T. Agapie, *J. Am. Chem. Soc.*, 2010, **132**, 6296-6297. <sup>c</sup> T. V. V. Ramakrishna and P. R. Sharp, *Organometallics*, 2004, **23**, 3079-3081. <sup>d</sup> this work. <sup>e</sup> M. A. Bennett, K. D. Griffiths, T. Okano, V. Parthasarathi and G. B. Robertson, *J. Am. Chem. Soc.*, 1990, **112**, 7047-7048.

**General Procedures.** Unless otherwise stated, all manipulations were performed under an inert atmosphere of nitrogen using either standard Schlenk techniques or an MBraun glovebox. Dry, oxygen-free solvents were employed throughout. Anhydrous pentane, toluene, and THF were purchased from Aldrich, sparged with dinitrogen, and passed through activated alumina under a positive pressure of nitrogen gas; toluene and hexanes were further deoxygenated using a Grubbs' type column system.<sup>1</sup> Benzene-*d*<sub>6</sub> was dried by heating at reflux with Na/K alloy in a sealed vessel under partial pressure then trap-to-trap distilled and freeze-pump-thaw degassed three times. Toluene-*d*<sub>8</sub> was purified in an analogous manner by heating at reflux over Na. THF-*d*<sub>8</sub> was purified in an analogous manner by heating at reflux over K. <sup>1</sup>H, <sup>31</sup>P{<sup>1</sup>H} and <sup>13</sup>C{<sup>1</sup>H} NMR spectra were recorded on a Bruker AMX Spectrometer operating at 300 MHz or 500 MHz with respect to proton nuclei. All chemical shifts are recorded in parts per million, and all coupling constants are reported in hertz. <sup>1</sup>H NMR spectra were referenced to residual protons (C<sub>6</sub>D<sub>5</sub>H, δ 7.16; C<sub>7</sub>D<sub>7</sub>H, δ 2.09; C<sub>4</sub>D<sub>7</sub>HO, δ 1.73) with respect to tetramethylsilane at δ 0.00. <sup>31</sup>P{<sup>1</sup>H} NMR spectra were referenced to external 85% H<sub>3</sub>PO<sub>4</sub> at δ 0.00. <sup>13</sup>C{<sup>1</sup>H} NMR spectra were referenced relative to solvent resonances (C<sub>6</sub>D<sub>6</sub>, δ 128.0; C<sub>7</sub>D<sub>8</sub>, δ 20.4; C<sub>4</sub>D<sub>8</sub>O, δ 25.37). Infrared spectra (IR) were recorded on a Bruker *Tensor 27* operating from 4000 – 400 cm<sup>-1</sup>. High Resolution Mass Spectroscopy (HRMS) was performed at McMaster University, Hamilton, Ontario, Canada. Elemental analyses were performed at the Center for Catalysis and Materials Research, Windsor, Ontario. The compounds benzene-*d*<sub>6</sub>, toluene-*d*<sub>8</sub>, and THF-*d*<sub>8</sub> were purchased from Cambridge Isotope Laboratory. Biphenylene<sup>2</sup> and Ni(COD)<sub>2</sub><sup>3</sup> (COD = 1,5 cyclooctadiene) were synthesized according literature methods. Triisopropylphosphine was purchased from STREM and *tert*-Butyllithium from Aldrich. Both were used without further purification.

**Synthesis of monodeuterated-Biphenylene (1-*d*<sub>1</sub>).** To a stirred solution of biphenylene (2.43 mmol, 370 mg) in the presence of (TMEDA) tetramethylethylenediamine (2.92 mmol, 340 mg) in 100 mL Et<sub>2</sub>O at –80 °C, a solution *tert*-Butyllithium (1.7 M) (3.16 mmol, 1.8 mL) was added dropwise over the

course of 30 min. The solution was then slowly warmed to room temperature and the progress of the reaction was monitored every 8 h by quenching an aliquot with D<sub>2</sub>O and analyzing by mass spectrometry. Additional *tert*-Butyllithium (1.7 M) (1.21 mmol, 0.71 mL) was added after 20 h. After 3 d the reaction mixture was quenched by D<sub>2</sub>O and all volatiles were removed under vacuum, and the residue was extracted with 50 mL of pentane and filtered through silica gel (mesh 70-230, 60 Å). The pentane was removed under vacuum which afforded a yellow oil. The oil was taken up in 5 mL pentane and cooled to 5 °C to provide pale yellow crystals of deuterated biphenylene (127 mg, 34% yield). Mass spectrometry revealed a 85 % conversion to **1-d<sub>1</sub>**, with 11.5 % **1** and 3.0 % **1-d<sub>2</sub>**, as minor impurities, which is consistent with the observed integrals observed in the <sup>1</sup>H NMR spectrum. <sup>1</sup>H NMR (C<sub>6</sub>D<sub>6</sub>, 300 K, 300 MHz): δ 6.41 (m, 3.1H, 1-Ar-H), 6.50 (m, 4H, 2-Ar-H).

**Synthesis of 4<sup>iPr</sup>**. To an ice cold suspension of Ni(COD)<sub>2</sub> (108 mg, 0.39 mmol) in 5 mL pentane, an excess of triisopropylphosphine (113 mg, 0.70 mmol) was added. After stirring for 5 minutes a cold solution of biphenylene (41 mg, 0.27 mmol) dissolved in 1 mL cold pentane was added dropwise, changing the color immediately from yellow to brown and stirred for additional 30 min. At -34 °C brown plates of **4<sup>iPr</sup>** were isolated suitable for X-ray diffraction. Yield (49 mg, 30 - 34%). <sup>1</sup>H NMR (C<sub>6</sub>D<sub>6</sub>, 300 MHz, 298 K): δ 0.51 (dd, <sup>3</sup>J(H,H) = 11.4 Hz, <sup>3</sup>J(P,H) = 6.9 Hz, 18H, P(CH(CH<sub>3</sub>)<sub>2</sub>)<sub>3</sub>); 0.79 (dd, <sup>3</sup>J(H,H) = 11.4 Hz, <sup>3</sup>J(P,H) = 6.9 Hz, 18H, P(CH(CH<sub>3</sub>)<sub>2</sub>)<sub>3</sub>); 1.29 (6H, m, P(CH(CH<sub>3</sub>)<sub>2</sub>)<sub>3</sub>), 6.75 (s(br), 4H, Ar-H), Ar-H), 7.02 (dd, apparent triplet, <sup>3</sup>J(H,H) = 7.5 Hz, 4H, Ar-H), 7.10 (m, 4H, Ar-H), 7.45 (dd, <sup>3</sup>J(H,H) = 7.5 Hz, <sup>4</sup>J(H,H) = 1.0 Hz, Ar-H). <sup>31</sup>P{<sup>1</sup>H} NMR (C<sub>6</sub>D<sub>6</sub>, 121.5 MHz, 298 K): δ 30.6 (s(br), W<sub>1/2</sub> = 1200 Hz, 2P, NiP<sup>i</sup>Pr<sub>3</sub>). <sup>13</sup>C{<sup>1</sup>H} NMR (C<sub>7</sub>D<sub>8</sub>, 75.5 MHz, 298 K): δ 20.4 (m, P(CH(CH<sub>3</sub>)<sub>2</sub>)<sub>3</sub>), 23.2 (d, <sup>1</sup>J(P,C) = 16.0 Hz, P(CH(CH<sub>3</sub>)<sub>2</sub>)<sub>3</sub>), 23.3 (119.8 (s, C-H), 123.9 (s, C-H), 126.2 (s, C-H), 151.5 (s, C-H); 154.2 (s, C); 162.2 (m(br), Ni-C). <sup>31</sup>P{<sup>1</sup>H} NMR (C<sub>7</sub>D<sub>8</sub>, 121.5 MHz, 298 K): δ 20 - 35 (s(vbr), 2P, NiP<sup>i</sup>Pr<sub>3</sub>); <sup>31</sup>P{<sup>1</sup>H} NMR (C<sub>7</sub>D<sub>8</sub>, 121.5 MHz, 233 K): δ 20.4 (d, <sup>3</sup>J(P,P) = 24.3 Hz, 1P, NiP<sup>i</sup>Pr<sub>3</sub>), 40.2 (d, <sup>3</sup>J(P,P) = 24.3 Hz, 1P, NiP<sup>i</sup>Pr<sub>3</sub>). IR (Nujol, KBr): 3034 m, 1924 w, 1889, 1570 m,

1557 m, 1278 s, 1236 m, 1154 m, 1092 s, 1060 m, 1028 m, 1010 m, 963 m, 929 m, 883 s, 850 w, 771 w, 735 vs, 653 vs, 600 m, 573 m, 525 s, 481 w, 433 w,  $\text{cm}^{-1}$ . Anal Calcd. for  $\text{C}_{42}\text{H}_{58}\text{Ni}_2\text{P}_2$  (742.24): C, 67.96; H, 7.88; Found: C, 67.69; H, 7.51.

**Variable Temperature  $^{31}\text{P}\{^1\text{H}\}$  NMR study of  $4^{i\text{Pr}}$ .** The exchange of  $^{31}\text{P}$  environments in  $4^{i\text{Pr}}$  is proposed to occur by the fluxional process depicted in Scheme S1. The  $\pi$ -interaction with the formally Ni(I) centre converts to a  $\sigma$ -bonding interaction. The symmetry of the intermediate is consistent with the observation of four aromatic proton environments in  $4^{i\text{Pr}}$  at room temperature, but two diastereotopic Me environments on the phosphine donors, even at temperatures where there is rapid exchange.

**Scheme S1.** Proposed intermediate in the fluxionality observed in the solution NMR spectrum of  $4^{i\text{Pr}}$ .

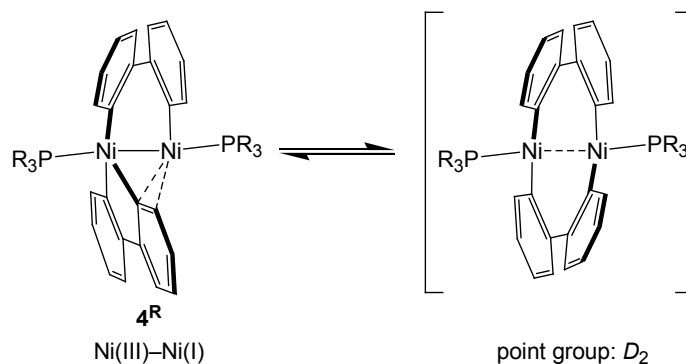

The modeled variable-temperature  $^{31}\text{P}\{^1\text{H}\}$  NMR spectra are shown in Figure S1, from 233 to 293 K. An Arrhenius plot, as shown in Figure S2, provided activation energy of  $E_a = 8.1 \text{ kcal}\cdot\text{mol}^{-1}$  (263 -293 K) for this process.

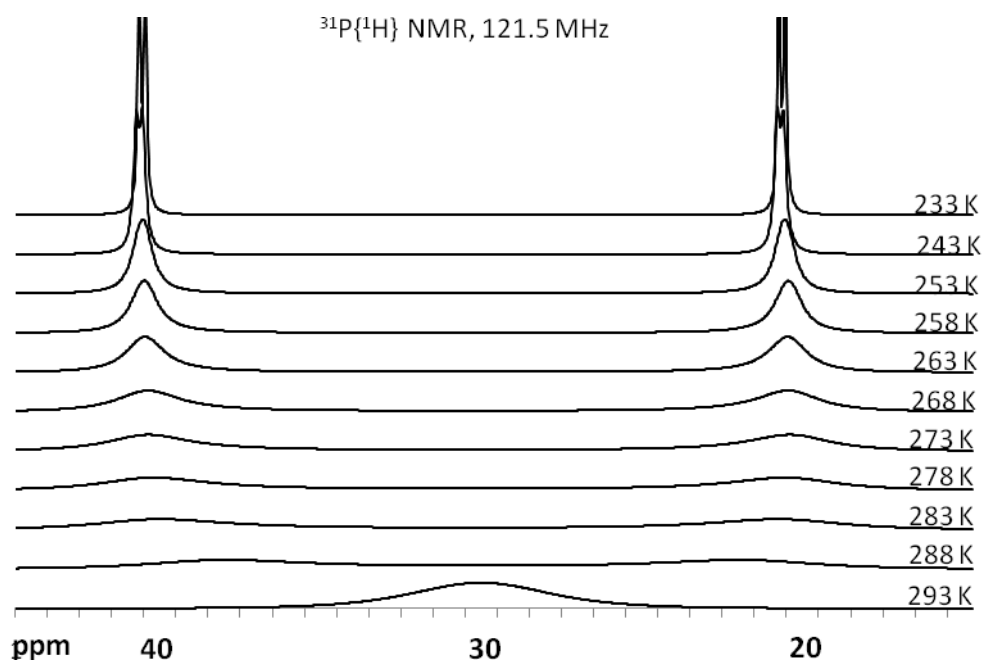

**Figure S1.** Stacked VT  $^{31}\text{P}\{^1\text{H}\}$  NMR spectra of proposed fluxionality of  $4^{4\text{Pr}}$ .

**Table S2.** Sample rate constants at various temperatures measured for compound  $4^{4\text{Pr}}$

| $k_{\text{ab}}/(\text{sec}^{-1})$ | T/(K) | $\ln(k/T)$ | $\ln k$ | $1/T \cdot (10^{-3} \text{ K}^{-1})$ |
|-----------------------------------|-------|------------|---------|--------------------------------------|
| 2777                              | 293   | 2.25       | 7.93    | 3.41                                 |
| 2252                              | 288   | 2.06       | 7.72    | 3.47                                 |
| 1815                              | 283   | 1.86       | 7.50    | 3.53                                 |
| 1484                              | 278   | 1.67       | 7.30    | 3.60                                 |
| 1129                              | 273   | 1.42       | 7.02    | 3.66                                 |
| 765                               | 268   | 1.04       | 6.63    | 3.73                                 |
| 562                               | 263   | 0.75       | 6.33    | 3.80                                 |
| 379                               | 258   | 0.38       | 5.93    | 3.88                                 |
| 212                               | 253   | -0.17      | 5.35    | 3.95                                 |
| 51                                | 243   | -1.56      | 3.93    | 4.11                                 |
| 7                                 | 233   | -3.50      | 1.94    | 4.29                                 |

<sup>a</sup>Rate constants obtained by computer simulations using the program WINDMR<sup>12</sup>

## Arrhenius- and Eyring-Plot

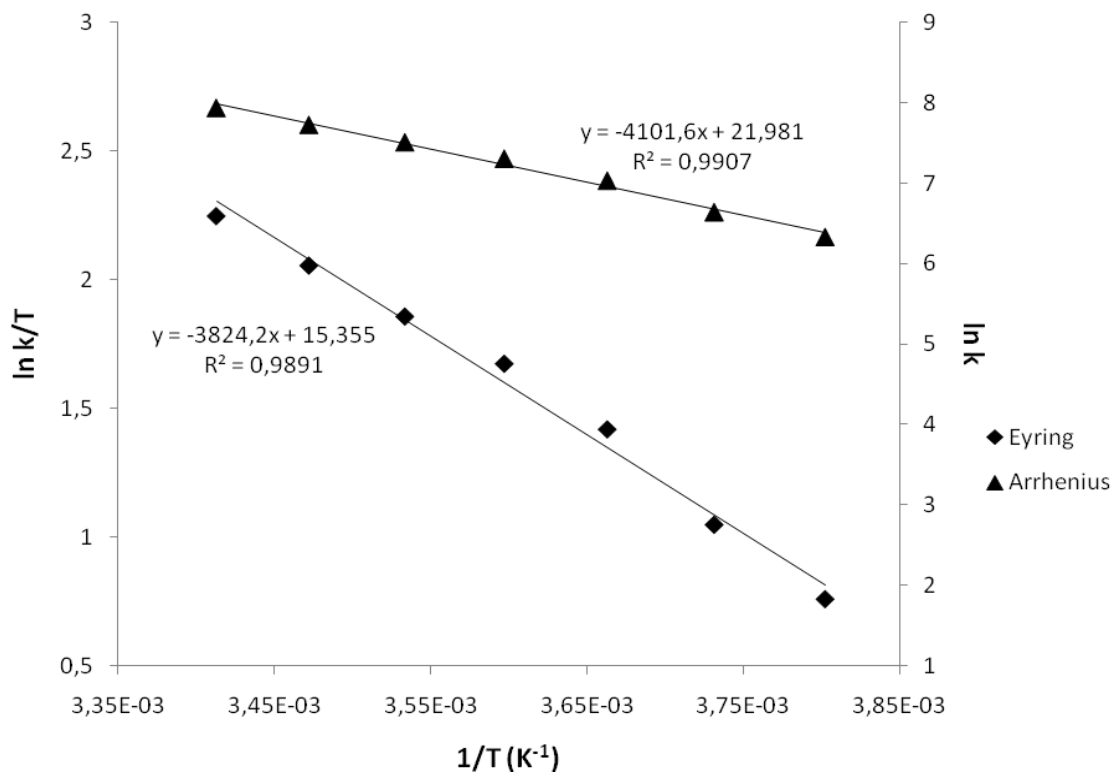

**Figure S2.** Standard Arrhenius- and Eyring-Plot of  $4^{iPr}$ ;  $E_a = 8.1 \text{ kcal}\cdot\text{mol}^{-1}$ ,  $\Delta G^\ddagger_{293 \text{ K}} = 12.4 \text{ kcal}\cdot\text{mol}^{-1}$ ,  $\Delta H^\ddagger = 7.6 \text{ kcal}\cdot\text{mol}^{-1}$ ,  $\Delta S^\ddagger = -16.5 \text{ cal}\cdot\text{mol}^{-1}\cdot\text{K}^{-1}$  (263 - 293 K)

**Synthesis of  $3^{iPr}$ .** One equivalent of triisopropylphosphine (65 mg 0.41 mmol) was added to a solution of Ni(COD)<sub>2</sub> (112 mg, 0.41 mmol) in 5 mL toluene at room temperature. After stirring for 5 minutes, biphenylene (62 mg, 0.41 mmol) dissolved in 1 mL toluene was added. Over the course of 20 h the solution turned green and the volatiles were removed in vacuum and the residue was extracted with pentane (2 × 10 mL). Cooling the solution to -34 °C afforded dark green needles suitable for X-ray diffraction. The combined yield from two recrystallizations was 129 mg (86%). <sup>1</sup>H NMR (C<sub>6</sub>D<sub>6</sub>, 300 MHz, 298 K): δ 0.86 (dd, <sup>3</sup>J(H,H) = 7.2 Hz, <sup>3</sup>J(P,H) = 3.6 Hz, 18H, P(CH(CH<sub>3</sub>)<sub>2</sub>)<sub>3</sub>); 0.88 (dd, <sup>3</sup>J(H,H) = 7.2 Hz, <sup>3</sup>J(P,H) = 3.6 Hz, 18H, P(CH(CH<sub>3</sub>)<sub>2</sub>)<sub>3</sub>), 1.70 (sept, <sup>3</sup>J(H,H) = 7.5 Hz, 6H, P(CH(CH<sub>3</sub>)<sub>2</sub>)<sub>3</sub>); 6.22 (dd, <sup>3</sup>J(H,H) = 7.0 Hz, <sup>4</sup>J(H,H) = 1.5 Hz, 2H, Ar-H); 6.64 (dd, <sup>3</sup>J(H,H) = 7.0 Hz, <sup>4</sup>J(H,H) = 1.5 Hz, 2H, Ar-H); 6.87 (dd, <sup>3</sup>J(H,H) = 7.0 Hz, <sup>4</sup>J(H,H) = 1.0 Hz, 2H, Ar-H); 7.02 (dd, <sup>3</sup>J(H,H) = 7.0 Hz, <sup>4</sup>J(H,H) =

1.5 Hz, 2H, Ar-H); 7.08 (dd,  $^3J(\text{H,H}) = 7.5$  Hz,  $^4J(\text{H,H}) = 1.5$  Hz, 2H, Ar-H); 7.10 – 7.13 (m, 6H, Ar-H); 7.33 (dd,  $^3J(\text{H,H}) = 7.5$  Hz,  $^4J(\text{H,H}) = 1.5$  Hz, 2H, Ar-H).  $^{13}\text{C}\{^1\text{H}\}$  NMR ( $\text{C}_6\text{D}_6$ , 75.5 MHz, 298 K):  $\delta$  19.9 (d,  $^2J(\text{P,C}) = 13.3$  Hz,  $\text{P}(\text{CH}(\text{CH}_3)_2)_3$ ), 20.7 (d,  $^2J(\text{P,C}) = 13.4$  Hz,  $\text{P}(\text{CH}(\text{CH}_3)_2)_3$ ), 21.7 (d,  $^2J(\text{P,C}) = 18.5$  Hz,  $\text{P}(\text{CH}(\text{CH}_3)_2)_3$ ), 23.9 (dvt,  $^1J(\text{P,C}) = 15.3$  Hz,  $^3J(\text{P,C}) = 5.8$  Hz,  $\text{P}(\text{CH}(\text{CH}_3)_2)_3$ ), 108.2 (s, C-H), 120.1 (s, C-H), 121.5 (s, C-H), 125.3 (s, C-H), 126.5 (s, C-H), 129.8 (s, C-H), 131.3 (s, C-H), 133.9 (s, C-H), 142.9 (s, C), 145.3 (s, C), 152.6 (s, C), 173.1 (vt,  $^2J(\text{P,C}) = 10.5$  Hz, Ni-C).  $^{31}\text{P}\{^1\text{H}\}$  NMR ( $\text{C}_6\text{D}_6$ , 121.5 MHz, 298 K):  $\delta$  43.6 (s,  $\text{NiPPr}_3$ ). IR (Nujol, KBr): 3061 w, 1884 vw, 1805 vw, 1557 m, 1524 m, 1494 w, 1414 w, 1238 m, 1197 w, 1155 w, 1085 w, 1025 m, 1005 m, 979 m, 943 w, 913 m, 883 m, 800 m, 755 s, 746 vs, 722 vs, 660 m, 637 m, 590 s, 565 w, 522 m, 474 m  $\text{cm}^{-1}$ . Anal Calcd. for  $\text{C}_{42}\text{H}_{58}\text{Ni}_2\text{P}_2$  (742.24): C, 67.96; H, 7.88; Found: C, 68.35, H, 8.27.

**Product Analysis by High resolution Mass Spectra (HRMS):** To demonstrate that HRMS provided suitable accuracy to distinguish between mixtures of deuterated and non-deuterated products a test reaction was performed with only non-deuterated reagents. Approximately equimolar amounts of  $\text{Ni}(\text{COD})_2$  (27 mg, 0.1 mmol) and biphenylene (15 mg, 0.1 mmol) and two equivalents triisopropylphosphine (32 mg, 0.2 mmol) were dissolved in 1 mL  $\text{C}_6\text{D}_6$ , to generate  $4^{i\text{Pr}}$  in situ. After 20 h, the reaction mixture contained the dinuclear Ni(I)-Ni(I) complex  $3^{i\text{Pr}}$  as the exclusive organometallic complex, as analyzed by  $^{31}\text{P}\{^1\text{H}\}$  NMR spectroscopy. The reaction was quenched by the direct addition of  $\text{Br}_2$ , as shown in equation 1.

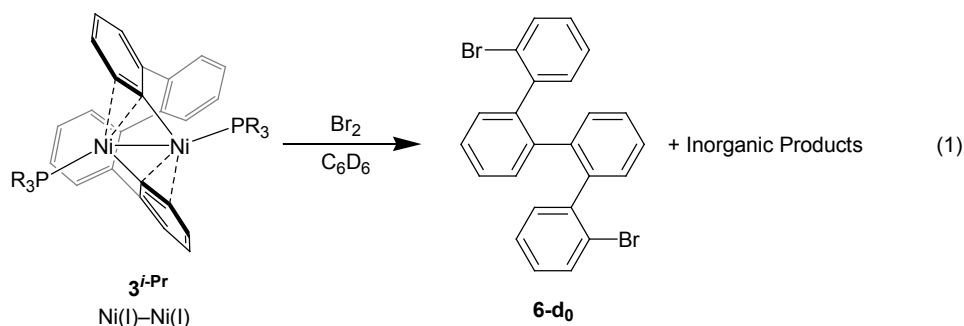



The solution was passed through a plug of silica gel (mesh 70-230, 60 Å) and the volatiles were removed in vacuum. The residue was dissolved in 1 mL CH<sub>2</sub>Cl<sub>2</sub> and purified by TLC (silica F-254) with a mixture of hexane/CH<sub>2</sub>Cl<sub>2</sub> (10:1) R<sub>f</sub> = 0.34. The HRMS isotope pattern of the 1,1'-dibromoquaterphenyl (**6-d<sub>0</sub>**) obtained was identified by HRMS, and is compared with the theoretical isotope pattern. (Figure S3). The maximum difference between the theoretical isotope pattern and the pattern observed experimentally is 0.3 %.

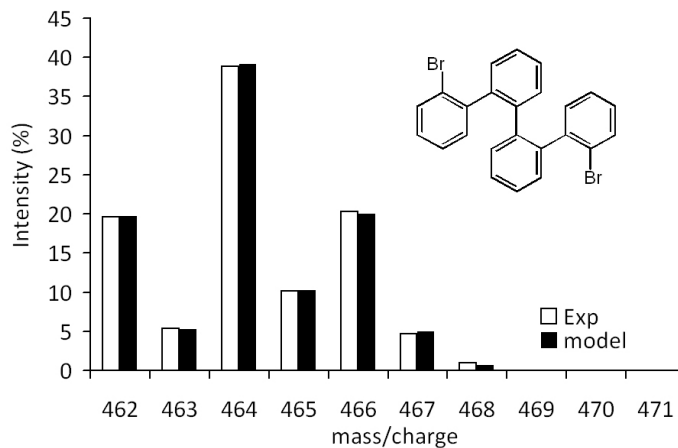

**Figure S3.** Experimental mass spectrum for 1,1'-Dibromoquaterphenyl **6-d<sub>0</sub>** shown as white bars. Alongside in black bars is the theoretical mass spectrum, normalized so that the total intensity equals 100 %. Theoretical m/e: 462 (19.8%), 463 (5.3%), 464 (39.11%), 465 (10.3%), 466 (20.0%), 467 (5.0%), 468 (0.7%).

An additional experiment was performed in an identical manner, except after the in situ generation of **4<sup>iPr</sup>** an equivalent of 85 % biphenylene-*d*<sub>1</sub> (15 mg, 0.1 mmol) was added. The mass spectrum obtained after bromination and workup was analogous to that shown in Figure S3, which confirms that **4<sup>iPr</sup>** does not reversibly reductively-eliminate/oxidatively-add biphenylene.

An analogous experiment was performed using the primarily biphenylene-*d*<sub>1</sub> (**1-d<sub>1</sub>**) sample to confirm the degree of deuteration. Approximately equimolar amounts of Ni(COD)<sub>2</sub> (27 mg, 0.1 mmol) and the biphenylene-*d*<sub>1</sub> (~85 % deuteration) (15 mg, 0.1 mmol) and two equivalents triisopropylphosphine (32 mg, 0.2 mmol) were dissolved in 1 mL C<sub>6</sub>D<sub>6</sub>, to generate **4<sup>iPr</sup>-d<sub>n</sub>** (n = 0-3) in

situ. After 20 h, the reaction mixture was quenched by the direct addition of Br<sub>2</sub>. The sample of **6-d<sub>n</sub>** (n = 0-3) was isolated in the same manner as **6-d<sub>0</sub>**. The HRMS isotope pattern of (**6-d<sub>n</sub>**) (n = 0-3) obtained was identified by HRMS, and is compared with a modeled isotope pattern. (Figure S4). The observed pattern corresponds to the sample of primarily **1-d<sub>1</sub>** being composed of 11.5 % **1-d<sub>0</sub>**, 85.5 % **1-d<sub>1</sub>**, and 3.0 % **1-d<sub>2</sub>**. The maximum difference between the theoretical isotope pattern and the experimental data is 0.3 %.

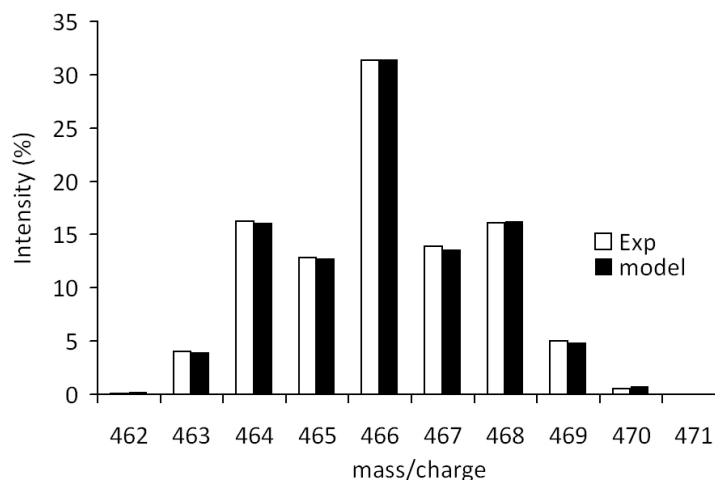

**Figure S4.** Experimental mass spectrum for 1,1'-Dibromoquaterphenyl **6-d<sub>n</sub>** (n = 0-3) produced from **4<sup>i</sup>-Pr-d<sub>1</sub>** (~85% **d<sub>1</sub>**) followed by bromination shown as white bars. The model spectrum shown as black bars was generated from the combination of theoretical spectra consistent with a mixture that is 1.3 % **6-d<sub>0</sub>**, 19.7 % **6-d<sub>1</sub>**, 74.0 % **6-d<sub>2</sub>**, and 5.0 % **6-d<sub>3</sub>**. This corresponds to the sample of primarily **1-d<sub>1</sub>** being composed of 11.5 % **1-d<sub>0</sub>**, 85.5 % **1-d<sub>1</sub>**, and 3.0 % **1-d<sub>2</sub>**.

**Deuterium Labeling Cross-Over Experiment.** Approximately equimolar amounts of Ni(COD)<sub>2</sub> (27 mg, 0.1 mmol) and biphenylene (15 mg, 0.1 mmol) and two equivalents triisopropylphosphine (32 mg, 0.2 mmol) were dissolved in 1 mL C<sub>6</sub>D<sub>6</sub>, to generate **4<sup>i</sup>-Pr** in situ. At the same time a sample was prepared in the analogous manner except using the biphenylene-**d<sub>1</sub>** (~85% **d<sub>1</sub>**). The samples were combined immediately. After 20 h, the reaction mixture was quenched by the direct addition of Br<sub>2</sub>.

The sample of  $6-d_n$  ( $n = 0-3$ ) was isolated in the same manner as  $6-d_0$ . The HRMS isotope pattern of ( $6-d_n$ ) ( $n = 0-3$ ) obtained was identified by HRMS.

The possible competing reactions in this cross-over experiment are the reversible equilibria between  $4^{iPr}-d_n$  ( $n = 0-3$ ) and  $5^{iPr}-d_n$  ( $n = 0-2$ ) shown on the left of Scheme S2, and the irreversible conversion of  $4^{iPr}-d_n$  to  $3^{iPr}-d_n$ .

Scheme S2.

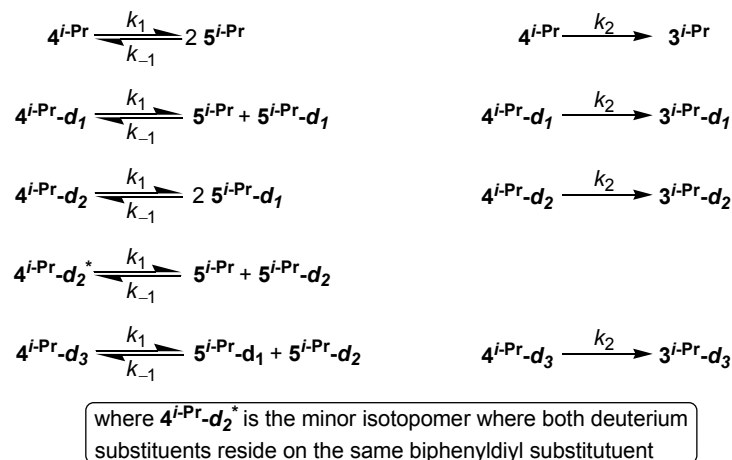

The experimental isotope pattern can be compared to those predicted if  $k_2$  is much larger than  $k_1$  (i.e. conversion to  $3^{iPr}$  is much faster than to  $5^{iPr}$ ), and conversely where  $k_1$  is much larger than  $k_2$ . These model isotope patterns are compared to the experimental data in Figure S5. The assumption that  $k_2$  is larger than  $k_1$  provides a much better fit, which demonstrates that the dinuclear species  $4^{iPr}$  does not convert to  $3^{iPr}$  via a mononuclear intermediate such as  $5^{iPr}$ . The value of  $k_{-1}$  was assumed to be at least 100 times greater than  $k_1$ , but the exact value had no observable effect on the product ratios.

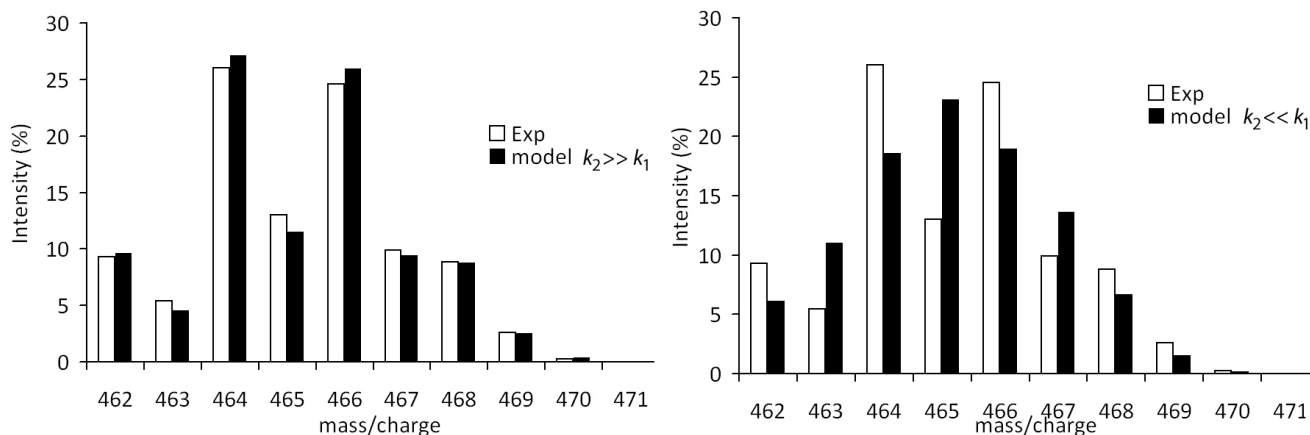

**Figure S5.** Experimental mass spectrum for the mixture of isotopomers of 1,1'-Dibromoquaterphenyl 6- $d_n$  ( $n=0$  to 3) shown as white bars obtained from the cross-over experiment performed with  $4^{iPr}-d_0$  and  $4^{iPr}-d_1$  (~85%  $d_1$ ), followed by quenching with  $Br_2$ . The left spectrum includes a model where no exchange occurs from  $4^{iPr}-d_n$ . The model included on the right involves rapid scrambling *via* the mononuclear  $5^{iPr}-d_n$ . The largest error in the fit shown on the left of Figure S5 is 1.5 %.

**Catalytic Conversion of Biphenylene to Tetraphenylene:** Biphenylene (15 mg, 0.0986 mmol),  $Ni(COD)_2$  (2 mg, 0.0072 mmol, 7.3 mol %) and  $iPr_3P$  (4 mg, 0.025 mmol) were dissolved in ca. 0.7 ml  $d_8$ -toluene. After heating at 90 °C for 16 h, the green solution was analyzed by  $^1H$  NMR spectroscopy. An 80 % conversion to tetraphenylene was observed, relative to unreacted biphenylene. (TON  $\cong$  11; TOF  $\cong$  0.68 h $^{-1}$ ).  $^1H$  NMR ( $C_7D_8$ , 300 K, 300 MHz):  $\delta$  7.03 (2<sup>nd</sup> order m, 8H, 1-Ar-H), 7.13 (2<sup>nd</sup> order m, 8H, 2-Ar-H).

**X-ray Crystallography.** The X-ray structures were obtained at low temperature, with the crystals covered in Paratone and placed rapidly into the cold  $N_2$  stream of the Kryo-Flex low-temperature device. The data were collected using the SMART<sup>4</sup> software on a Bruker APEX CCD diffractometer using a graphite monochromator with Mo  $K\alpha$  radiation ( $\lambda = 0.71073$  Å). A hemisphere of data was collected using a counting time of 10–30 s per frame. Data reductions were performed using the SAINT<sup>5</sup> software, and the data were corrected for absorption using SADABS.<sup>6</sup> The structures were solved by direct or Patterson's methods using SHELXS-97<sup>7</sup> and refined by full-matrix least-squares on  $F^2$  with anisotropic displacement parameters for the non-H atoms using SHELX-97<sup>7</sup> and the WinGX<sup>8</sup> software package, and thermal ellipsoid plots were produced using ORTEP32.<sup>9</sup>

Complex  $3^{iPr}$  features disorder of two of the isopropyl groups attached to P(2), disordered with respect to rotation around the P–C bonds. The two arrangements of these groups are labeled A and B for C(34), C(35), C(36), C(41), C(42) and C(53). The population at these two sites was refined, with a 57 % occupation of the A sites.

**Calculations.** Ab initio DFT calculations were performed using the hybrid functional B3LYP<sup>10</sup> method with the Gaussian 09 package.<sup>11</sup> The basis functions used were the TZVP set, provided in the Gaussian 09 program. All geometries were optimized, and frequency calculations were performed to ensure that the geometries were local minima, and possessed no imaginary frequencies. Complex **5<sup>Me</sup>** only exhibited zero imaginary frequencies with  $C_s$ , rather than  $C_1$  symmetry.

Additional calculations using a solvent model were done using the polarizable continuum model (PCM) default parameters in Gaussian 09. Calculations for both **4<sup>Me</sup>** and **5<sup>Me</sup>** were done with PCM parameters appropriate for both n-pentane and toluene as the solvent. Species **5<sup>Me</sup>** retained  $C_s$  symmetry with n-pentane as the model solvent, but was found to have no imaginary frequencies only in  $C_1$  symmetry with toluene as the model solvent.

#### Optimized Coordinates and Energies for **4<sup>Me</sup>** and **5<sup>Me</sup>**.

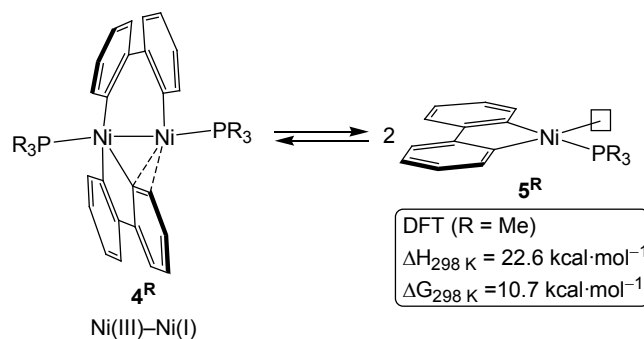

**Table S3.** Energies from DFT vibrational analyses of  $5^{\text{Me}}$  and  $4^{\text{Me}}$ .

|                                             | $5^{\text{Me}}$ | $4^{\text{Me}}$ |
|---------------------------------------------|-----------------|-----------------|
| Sum of electronic and zero-point Energies   | -2431.512328    | -4863.055356    |
| Sum of electronic and thermal Energies      | -2431.493733    | -4863.018127    |
| Sum of electronic and thermal Enthalpies    | -2431.492788    | -4863.017183    |
| Sum of electronic and thermal Free Energies | -2431.560226    | -4863.124837    |

  

|                                             | $5^{\text{Me}}$ <i>n</i> -pentane | $4^{\text{Me}}$ <i>n</i> -pentane |
|---------------------------------------------|-----------------------------------|-----------------------------------|
| Sum of electronic and zero-point Energies   | -2431.518317                      | -4863.059856                      |
| Sum of electronic and thermal Energies      | -2431.499728                      | -4863.022639                      |
| Sum of electronic and thermal Enthalpies    | -2431.498784                      | -4863.021694                      |
| Sum of electronic and thermal Free Energies | -2431.566882                      | -4863.128772                      |

  

|                                             | $5^{\text{Me}}$ toluene | $4^{\text{Me}}$ toluene |
|---------------------------------------------|-------------------------|-------------------------|
| Sum of electronic and zero-point Energies   | -2431.520429            | -4863.061556            |
| Sum of electronic and thermal Energies      | -2431.501919            | -4863.024344            |
| Sum of electronic and thermal Enthalpies    | -2431.500975            | -4863.023400            |
| Sum of electronic and thermal Free Energies | -2431.568088            | -4863.130341            |

**Table S4. Optimized Cartesian Coordinates (Å) for 4<sup>Me</sup>.**

| number | element | X        | y        | z        | number | element | x        | y        | z        |
|--------|---------|----------|----------|----------|--------|---------|----------|----------|----------|
| 1      | H       | -4.7233  | 1.787807 | 2.275361 | 35     | C       | -0.01572 | 1.510076 | -1.19255 |
| 2      | C       | -4.16294 | -0.99238 | 1.20327  | 36     | C       | 3.134355 | 3.799163 | 1.652282 |
| 3      | H       | -3.64962 | -1.39111 | 2.076824 | 37     | C       | 0.457007 | 2.806289 | -0.83446 |
| 4      | C       | -3.65485 | 1.729022 | 2.058866 | 38     | C       | 1.581112 | 2.783573 | 0.103098 |
| 5      | C       | -4.46816 | 1.194081 | -0.65589 | 39     | C       | -0.09514 | -1.46704 | -1.21489 |
| 6      | P       | -3.33126 | 0.563386 | 0.661602 | 40     | H       | 4.404987 | 2.422214 | 2.705536 |
| 7      | H       | -4.12886 | 2.173084 | -0.99191 | 41     | C       | 3.618463 | 2.534269 | 1.966791 |
| 8      | H       | -0.37134 | -1.00262 | 4.826045 | 42     | C       | -0.7858  | -2.91455 | -3.07239 |
| 9      | C       | -0.46675 | -1.31374 | 3.791906 | 43     | C       | 3.093835 | 1.406526 | 1.332316 |
| 10     | H       | -0.16043 | -3.39956 | 4.219079 | 44     | C       | 2.078943 | 1.483848 | 0.371545 |
| 11     | H       | -0.81324 | 0.679625 | 3.085839 | 45     | H       | 3.505111 | 0.447048 | 1.621459 |
| 12     | C       | -0.34416 | -2.65711 | 3.451559 | 46     | 28      | 1.088058 | 0.019213 | -0.52896 |
| 13     | C       | -0.7187  | -0.36232 | 2.801442 | 47     | H       | -0.82652 | -3.09743 | -4.14089 |
| 14     | H       | -1.71339 | -4.2925  | -0.12441 | 48     | C       | -0.19149 | -1.75039 | -2.58615 |
| 15     | C       | -0.43035 | -3.04222 | 2.116198 | 49     | H       | 0.232594 | -1.05512 | -3.30494 |
| 16     | C       | -0.83066 | -0.74012 | 1.464225 | 50     | P       | 2.85684  | -1.46568 | -0.49688 |
| 17     | Ni      | -1.23884 | 0.395639 | 0.005008 | 51     | C       | 3.244213 | -2.31657 | 1.104879 |
| 18     | H       | -0.29614 | -4.08462 | 1.84718  | 52     | H       | 4.74572  | 0.09352  | -0.3551  |
| 19     | C       | -0.65306 | -2.09469 | 1.111952 | 53     | H       | 1.928791 | -3.55169 | -1.38704 |
| 20     | C       | -1.26615 | -3.58923 | -0.81911 | 54     | C       | 4.484864 | -0.73883 | -1.00446 |
| 21     | H       | -1.78652 | -4.75062 | -2.55349 | 55     | H       | 4.108531 | -2.97422 | 0.992223 |
| 22     | C       | -0.67411 | -2.41824 | -0.33274 | 56     | C       | 2.782038 | -2.9236  | -1.63687 |
| 23     | H       | -2.44265 | 2.498081 | -3.40585 | 57     | H       | -4.44647 | 0.514621 | -1.50795 |
| 24     | C       | -1.31926 | -3.84468 | -2.18569 | 58     | H       | -5.49134 | 1.268758 | -0.28199 |
| 25     | H       | -1.64259 | 4.733485 | -2.69423 | 59     | H       | -4.09504 | -1.7297  | 0.403397 |
| 26     | C       | -1.65695 | 2.589537 | -2.66428 | 60     | H       | -5.21214 | -0.81044 | 1.443202 |
| 27     | C       | -1.1994  | 3.835748 | -2.27893 | 61     | H       | -3.2846  | 2.719772 | 1.795536 |
| 28     | H       | 1.712159 | 4.903434 | 0.495933 | 62     | H       | -3.12785 | 1.386702 | 2.948213 |
| 29     | H       | 0.219616 | 4.926081 | -1.09618 | 63     | H       | 5.274337 | -1.49278 | -0.9777  |
| 30     | C       | -1.06085 | 1.429453 | -2.13445 | 64     | H       | 4.392206 | -0.35568 | -2.02148 |
| 31     | H       | -1.37155 | 0.470868 | -2.5318  | 65     | H       | 2.376503 | -2.90282 | 1.405672 |
| 32     | C       | -0.14456 | 3.941693 | -1.36671 | 66     | H       | 3.44452  | -1.59083 | 1.890269 |
| 33     | H       | 3.541017 | 4.679843 | 2.135354 | 67     | H       | 3.70171  | -3.50712 | -1.5596  |
| 34     | C       | 2.110319 | 3.920019 | 0.721113 | 68     | H       | 2.657387 | -2.58318 | -2.66401 |

Stoichiometry: C<sub>30</sub>H<sub>34</sub>Ni<sub>2</sub>P<sub>2</sub>

Full point group: C<sub>1</sub>

| Item                 | Value    | Threshold | Converged? |
|----------------------|----------|-----------|------------|
| Maximum Force        | 0.000005 | 0.00045   | YES        |
| RMS Force            | 0.000001 | 0.0003    | YES        |
| Maximum Displacement | 0.001541 | 0.0018    | YES        |
| RMS Displacement     | 0.000281 | 0.0012    | YES        |

**Table S5. Optimized Cartesian Coordinates (Å) for 4<sup>Me</sup> with a *n*-pentane solvent model.**

| number | element | x        | y        | z        | number | element | x        | y        | z        |
|--------|---------|----------|----------|----------|--------|---------|----------|----------|----------|
| 1      | H       | -4.76156 | 1.720001 | 2.265452 | 35     | C       | -0.03909 | 1.504617 | -1.19461 |
| 2      | C       | -4.16372 | -1.05192 | 1.191399 | 36     | C       | 3.058275 | 3.854588 | 1.661866 |
| 3      | H       | -3.64748 | -1.45022 | 2.063279 | 37     | C       | 0.413646 | 2.809504 | -0.84056 |
| 4      | C       | -3.69101 | 1.673961 | 2.057442 | 38     | C       | 1.53296  | 2.808184 | 0.104239 |
| 5      | C       | -4.48546 | 1.135573 | -0.66367 | 39     | C       | -0.0607  | -1.47193 | -1.21621 |
| 6      | P       | -3.35046 | 0.515906 | 0.659369 | 40     | H       | 4.348161 | 2.502184 | 2.724413 |
| 7      | H       | -4.16007 | 2.1219   | -0.99167 | 41     | C       | 3.563811 | 2.598797 | 1.981088 |
| 8      | H       | -0.37304 | -1.01213 | 4.827418 | 42     | C       | -0.72408 | -2.93313 | -3.07366 |
| 9      | C       | -0.45748 | -1.32388 | 3.792459 | 43     | C       | 3.063387 | 1.460554 | 1.344911 |
| 10     | H       | -0.10155 | -3.40275 | 4.21693  | 44     | C       | 2.052144 | 1.517486 | 0.378133 |
| 11     | H       | -0.85487 | 0.660605 | 3.089443 | 45     | H       | 3.491306 | 0.509107 | 1.636501 |
| 12     | C       | -0.30177 | -2.66358 | 3.45031  | 46     | Ni      | 1.090758 | 0.034169 | -0.527   |
| 13     | C       | -0.73018 | -0.37734 | 2.80264  | 47     | H       | -0.75822 | -3.1186  | -4.14202 |
| 14     | H       | -1.64128 | -4.3188  | -0.12574 | 48     | C       | -0.1483  | -1.75944 | -2.58732 |
| 15     | C       | -0.37659 | -3.04832 | 2.113967 | 49     | H       | 0.268615 | -1.06013 | -3.30631 |
| 16     | C       | -0.829   | -0.75481 | 1.464001 | 50     | P       | 2.887734 | -1.42058 | -0.49031 |
| 17     | Ni      | -1.25046 | 0.376721 | 0.006632 | 51     | C       | 3.281992 | -2.2681  | 1.111093 |
| 18     | H       | -0.21712 | -4.08685 | 1.843825 | 52     | H       | 4.753168 | 0.164341 | -0.32875 |
| 19     | C       | -0.61913 | -2.10465 | 1.110519 | 53     | H       | 1.998039 | -3.5172  | -1.39193 |
| 20     | C       | -1.20201 | -3.61045 | -0.82033 | 54     | C       | 4.505542 | -0.66492 | -0.98722 |
| 21     | H       | -1.69963 | -4.78313 | -2.55427 | 55     | H       | 4.157928 | -2.91024 | 0.999949 |
| 22     | C       | -0.62914 | -2.42965 | -0.33431 | 56     | C       | 2.84259  | -2.87509 | -1.63531 |
| 23     | H       | -2.47173 | 2.450773 | -3.42061 | 57     | H       | -4.44871 | 0.459968 | -1.51811 |
| 24     | C       | -1.2469  | -3.86959 | -2.18683 | 58     | H       | -5.51118 | 1.192588 | -0.29409 |
| 25     | H       | -1.70164 | 4.700727 | -2.72001 | 59     | H       | -4.09004 | -1.78293 | 0.386426 |
| 26     | C       | -1.68771 | 2.556501 | -2.67929 | 60     | H       | -5.2142  | -0.8803  | 1.432375 |
| 27     | C       | -1.24803 | 3.810959 | -2.29896 | 61     | H       | -3.32987 | 2.669078 | 1.798511 |
| 28     | H       | 1.623429 | 4.931322 | 0.494442 | 62     | H       | -3.1673  | 1.335009 | 2.949901 |
| 29     | H       | 0.151059 | 4.925403 | -1.11504 | 63     | H       | 5.304669 | -1.40849 | -0.9637  |
| 30     | C       | -1.07861 | 1.407301 | -2.1413  | 64     | H       | 4.410838 | -0.27458 | -2.00124 |
| 31     | H       | -1.37799 | 0.442843 | -2.53297 | 65     | H       | 2.423398 | -2.87028 | 1.406345 |
| 32     | C       | -0.19879 | 3.934847 | -1.38221 | 66     | H       | 3.466875 | -1.54084 | 1.898959 |
| 33     | H       | 3.445732 | 4.743393 | 2.146075 | 67     | H       | 3.770986 | -3.44373 | -1.55342 |
| 34     | C       | 2.037696 | 3.955489 | 0.723719 | 68     | H       | 2.719921 | -2.53225 | -2.66188 |



**Table S6. Optimized Cartesian Coordinates (Å) for 4<sup>Me</sup> with a toluene solvent model.**

| number | element | x        | y        | z        | number | element | x        | y        | z        |
|--------|---------|----------|----------|----------|--------|---------|----------|----------|----------|
| 1      | H       | -4.77452 | 1.699358 | 2.259629 | 35     | C       | -0.04584 | 1.503384 | -1.19464 |
| 2      | C       | -4.16432 | -1.07037 | 1.187629 | 36     | C       | 3.038259 | 3.870973 | 1.663085 |
| 3      | H       | -3.6479  | -1.46679 | 2.060205 | 37     | C       | 0.400556 | 2.81075  | -0.84116 |
| 4      | C       | -3.70344 | 1.658024 | 2.053863 | 38     | C       | 1.519286 | 2.815611 | 0.104801 |
| 5      | C       | -4.49146 | 1.115146 | -0.66888 | 39     | C       | -0.05103 | -1.473   | -1.21549 |
| 6      | P       | -3.35738 | 0.500845 | 0.656934 | 40     | H       | 4.33587  | 2.525882 | 2.725866 |
| 7      | H       | -4.17114 | 2.103737 | -0.99492 | 41     | C       | 3.551015 | 2.617983 | 1.982482 |
| 8      | H       | -0.37575 | -1.01104 | 4.828706 | 42     | C       | -0.706   | -2.93938 | -3.07205 |
| 9      | C       | -0.45589 | -1.3237  | 3.793664 | 43     | C       | 3.057044 | 1.476756 | 1.346213 |
| 10     | H       | -0.08312 | -3.39956 | 4.218992 | 44     | C       | 2.045535 | 1.52763  | 0.379056 |
| 11     | H       | -0.87104 | 0.656806 | 3.090059 | 45     | H       | 3.490703 | 0.527829 | 1.637494 |
| 12     | C       | -0.28872 | -2.66223 | 3.452008 | 46     | Ni      | 1.091887 | 0.03865  | -0.52648 |
| 13     | C       | -0.73535 | -0.3797  | 2.803192 | 47     | H       | -0.73862 | -3.12599 | -4.14029 |
| 14     | H       | -1.61714 | -4.32727 | -0.12317 | 48     | C       | -0.13653 | -1.7622  | -2.58642 |
| 15     | C       | -0.35941 | -3.04794 | 2.115625 | 49     | H       | 0.277386 | -1.06171 | -3.30596 |
| 16     | C       | -0.82924 | -0.75805 | 1.46433  | 50     | P       | 2.896826 | -1.40813 | -0.48891 |
| 17     | Ni      | -1.25442 | 0.370452 | 0.006241 | 51     | C       | 3.294822 | -2.25386 | 1.112375 |
| 18     | H       | -0.19149 | -4.08529 | 1.846122 | 52     | H       | 4.755995 | 0.184096 | -0.32508 |
| 19     | C       | -0.60848 | -2.10648 | 1.111661 | 53     | H       | 2.017308 | -3.5083  | -1.39115 |
| 20     | C       | -1.18129 | -3.61719 | -0.81816 | 54     | C       | 4.511123 | -0.6447  | -0.98516 |
| 21     | H       | -1.67192 | -4.79423 | -2.55129 | 55     | H       | 4.173667 | -2.89182 | 1.000652 |
| 22     | C       | -0.61508 | -2.4328  | -0.33299 | 56     | C       | 2.85879  | -2.86217 | -1.63446 |
| 23     | H       | -2.48175 | 2.438016 | -3.42227 | 57     | H       | -4.44921 | 0.440121 | -1.52346 |
| 24     | C       | -1.2242  | -3.87792 | -2.18455 | 58     | H       | -5.51801 | 1.16609  | -0.3009  |
| 25     | H       | -1.7214  | 4.692008 | -2.72334 | 59     | H       | -4.08787 | -1.8006  | 0.382251 |
| 26     | C       | -1.69778 | 2.547738 | -2.68153 | 60     | H       | -5.21548 | -0.90196 | 1.427562 |
| 27     | C       | -1.2639  | 3.804495 | -2.30181 | 61     | H       | -3.34623 | 2.654446 | 1.794683 |
| 28     | H       | 1.59779  | 4.939533 | 0.494819 | 62     | H       | -3.18007 | 1.321728 | 2.947486 |
| 29     | H       | 0.129204 | 4.925626 | -1.11725 | 63     | H       | 5.312814 | -1.38544 | -0.96257 |
| 30     | C       | -1.0841  | 1.401606 | -2.14236 | 64     | H       | 4.414825 | -0.25356 | -1.9987  |
| 31     | H       | -1.3802  | 0.435735 | -2.53304 | 65     | H       | 2.439155 | -2.86029 | 1.407357 |
| 32     | C       | -0.21586 | 3.93332  | -1.38423 | 66     | H       | 3.476777 | -1.52593 | 1.900339 |
| 33     | H       | 3.420452 | 4.762081 | 2.147306 | 67     | H       | 3.78991  | -3.42616 | -1.55205 |
| 34     | C       | 2.017321 | 3.966008 | 0.724386 | 68     | H       | 2.735226 | -2.51922 | -2.66086 |

**Table S7. Optimized Cartesian Coordinates (Å) for 5<sup>Me</sup>.**

| number | element | x        | y        | z        |
|--------|---------|----------|----------|----------|
| 1      | H       | 3.542717 | -3.76983 | 0        |
| 2      | H       | 1.600744 | -5.30116 | 0        |
| 3      | C       | 2.535471 | -3.36831 | 0        |
| 4      | C       | 1.44394  | -4.22887 | 0        |
| 5      | H       | -2.75229 | -3.2187  | 0        |
| 6      | H       | -0.69857 | -4.39876 | 0        |
| 7      | C       | 2.334893 | -1.98166 | 0        |
| 8      | H       | 3.205678 | -1.3298  | 0        |
| 9      | C       | 0.145169 | -3.71705 | 0        |
| 10     | H       | -4.71967 | -1.72265 | 0        |
| 11     | C       | -2.60998 | -2.1437  | 0        |
| 12     | C       | 1.046512 | -1.45746 | 0        |
| 13     | C       | -3.72162 | -1.30077 | 0        |
| 14     | C       | -0.0521  | -2.33953 | 0        |
| 15     | C       | -1.32448 | -1.60894 | 0        |
| 16     | H       | -4.41135 | 0.734342 | 0        |
| 17     | C       | -3.54956 | 0.076554 | 0        |
| 18     | C       | -2.25801 | 0.621245 | 0        |
| 19     | C       | -1.14401 | -0.20596 | 0        |
| 20     | H       | -2.15553 | 1.700852 | 0        |
| 21     | Ni      | 0.645028 | 0.387271 | 0        |
| 22     | P       | 0.678134 | 2.69984  | 0        |
| 23     | C       | -0.0521  | 3.589469 | 1.44954  |
| 24     | H       | -1.11816 | 3.372569 | -1.51281 |
| 25     | H       | 2.949103 | 2.955765 | 0.883482 |
| 26     | C       | -0.0521  | 3.589469 | -1.44954 |
| 27     | H       | 0.092665 | 4.6687   | 1.370405 |
| 28     | C       | 2.426743 | 3.324917 | 0        |
| 29     | H       | 0.092665 | 4.6687   | -1.37041 |
| 30     | H       | 0.417319 | 3.228955 | -2.36513 |
| 31     | H       | 0.417319 | 3.228955 | 2.365125 |
| 32     | H       | -1.11816 | 3.372569 | 1.512812 |
| 33     | H       | 2.460992 | 4.416077 | 0        |
| 34     | H       | 2.949103 | 2.955765 | -0.88348 |

Stoichiometry: C<sub>15</sub>H<sub>17</sub>NiP

Full point group: C<sub>s</sub>

| Item                 | Value    | Threshold | Converged? |
|----------------------|----------|-----------|------------|
| Maximum Force        | 0.000003 | 0.00045   | YES        |
| RMS Force            | 0.000001 | 0.0003    | YES        |
| Maximum Displacement | 0.000105 | 0.0018    | YES        |
| RMS Displacement     | 0.000024 | 0.0012    | YES        |

**Table S8. Optimized Cartesian Coordinates (Å) for 5<sup>Me</sup> with a *n*-pentane solvent model.**

| number | element | x        | y        | z        |
|--------|---------|----------|----------|----------|
| 1      | H       | 3.542899 | -3.77795 | 0        |
| 2      | H       | 1.597227 | -5.30627 | 0        |
| 3      | C       | 2.536288 | -3.37457 | 0        |
| 4      | C       | 1.442894 | -4.23357 | 0        |
| 5      | H       | -2.74528 | -3.2252  | 0        |
| 6      | H       | -0.69998 | -4.39837 | 0        |
| 7      | C       | 2.337689 | -1.98743 | 0        |
| 8      | H       | 3.209529 | -1.337   | 0        |
| 9      | C       | 0.145141 | -3.71828 | 0        |
| 10     | H       | -4.71811 | -1.73625 | 0        |
| 11     | C       | -2.60654 | -2.14965 | 0        |
| 12     | C       | 1.050454 | -1.4574  | 0        |
| 13     | C       | -3.7215  | -1.31083 | 0        |
| 14     | C       | -0.04924 | -2.33961 | 0        |
| 15     | C       | -1.32268 | -1.60943 | 0        |
| 16     | H       | -4.41712 | 0.722589 | 0        |
| 17     | C       | -3.55319 | 0.067544 | 0        |
| 18     | C       | -2.2635  | 0.616798 | 0        |
| 19     | C       | -1.14427 | -0.20521 | 0        |
| 20     | H       | -2.16485 | 1.696416 | 0        |
| 21     | Ni      | 0.643931 | 0.390347 | 0        |
| 22     | P       | 0.673164 | 2.709422 | 0        |
| 23     | C       | -0.04924 | 3.602552 | 1.450175 |
| 24     | H       | -1.11776 | 3.397981 | -1.51335 |
| 25     | H       | 2.94536  | 2.935665 | 0.883988 |
| 26     | C       | -0.04924 | 3.602552 | -1.45018 |
| 27     | H       | 0.106892 | 4.679886 | 1.369381 |
| 28     | C       | 2.428533 | 3.310892 | 0        |
| 29     | H       | 0.106892 | 4.679886 | -1.36938 |
| 30     | H       | 0.417746 | 3.238131 | -2.36539 |
| 31     | H       | 0.417746 | 3.238131 | 2.365387 |
| 32     | H       | -1.11776 | 3.397981 | 1.513354 |
| 33     | H       | 2.460992 | 4.416077 | 0        |
| 34     | H       | 2.949103 | 2.955765 | -0.88348 |

**Table S9. Optimized Cartesian Coordinates (Å) for 5<sup>Me</sup> with a toluene solvent model.**

| number | element | x        | y        | z        |
|--------|---------|----------|----------|----------|
| 1      | H       | -3.56015 | -3.7788  | -2.2E-05 |
| 2      | H       | -5.20212 | -1.92779 | 0.000412 |
| 3      | C       | -3.21739 | -2.74992 | -0.00003 |
| 4      | C       | -4.14049 | -1.70982 | 0.000234 |
| 5      | H       | -3.39006 | 2.527694 | 0.000336 |
| 6      | H       | -4.4323  | 0.419597 | 0.000466 |
| 7      | C       | -1.84441 | -2.46878 | -0.00024 |
| 8      | H       | -1.14342 | -3.30019 | -0.00047 |
| 9      | C       | -3.70331 | -0.3837  | 0.000243 |
| 10     | H       | -2.02864 | 4.589885 | 0.000189 |
| 11     | C       | -2.30789 | 2.456368 | 0.000153 |
| 12     | C       | -1.39094 | -1.15224 | -0.0003  |
| 13     | C       | -1.54111 | 3.622123 | 0.000073 |
| 14     | C       | -2.33831 | -0.10756 | 0.000012 |
| 15     | C       | -1.68775 | 1.208781 | 0.000001 |
| 16     | H       | 0.444864 | 4.44411  | -0.00023 |
| 17     | C       | -0.15468 | 3.540774 | -0.00016 |
| 18     | C       | 0.474194 | 2.288192 | -0.00029 |
| 19     | C       | -0.27482 | 1.118279 | -0.00024 |
| 20     | H       | 1.55757  | 2.257547 | -0.00045 |
| 21     | Ni      | 0.430422 | -0.62952 | -0.0002  |
| 22     | P       | 2.749708 | -0.47949 | 0.000071 |
| 23     | C       | 3.589577 | 0.300608 | 1.451932 |
| 24     | H       | 3.31715  | 1.353981 | -1.5151  |
| 25     | H       | 3.130604 | -2.73041 | 0.883799 |
| 26     | C       | 3.590496 | 0.301085 | -1.45102 |
| 27     | H       | 4.674798 | 0.214132 | 1.372306 |
| 28     | C       | 3.469865 | -2.18911 | -0.00011 |
| 29     | H       | 4.675681 | 0.215061 | -1.37041 |
| 30     | H       | 3.256808 | -0.19035 | -2.36512 |
| 31     | H       | 3.254855 | -0.19068 | 2.365729 |
| 32     | H       | 3.316616 | 1.353624 | 1.515757 |
| 33     | H       | 4.560883 | -2.15921 | 0.000308 |
| 34     | H       | 3.131254 | -2.72987 | -0.8846  |

## Tables of Crystallographic Data for $3^{iPr}$ .

**Table S10.** Crystal data and structure refinement for  $3^{iPr}$ .

|                                   |                                                              |                              |
|-----------------------------------|--------------------------------------------------------------|------------------------------|
| Empirical formula                 | $C_{42} H_{58} Ni_2 P_2$                                     |                              |
| Formula weight                    | 742.24                                                       |                              |
| Temperature                       | 173(2) K                                                     |                              |
| Wavelength                        | 0.71073 Å                                                    |                              |
| Crystal system                    | Monoclinic                                                   |                              |
| Space group                       | P2(1)/c                                                      |                              |
| Unit cell dimensions              | $a = 9.1261(14)$ Å                                           | $\alpha = 90^\circ$ .        |
|                                   | $b = 24.900(4)$ Å                                            | $\beta = 100.710(2)^\circ$ . |
|                                   | $c = 17.1650(17)$ Å                                          | $\gamma = 90^\circ$ .        |
| Volume                            | $3832.7(9)$ Å <sup>3</sup>                                   |                              |
| Z                                 | 4                                                            |                              |
| Density (calculated)              | 1.286 Mg/m <sup>3</sup>                                      |                              |
| Absorption coefficient            | 1.094 mm <sup>-1</sup>                                       |                              |
| F(000)                            | 1584                                                         |                              |
| Crystal size                      | 0.45 x 0.4 x 0.25 mm <sup>3</sup>                            |                              |
| Theta range for data collection   | 2.27 to 27.50°.                                              |                              |
| Index ranges                      | $-11 \leq h \leq 11, -32 \leq k \leq 32, -21 \leq l \leq 21$ |                              |
| Reflections collected             | 42451                                                        |                              |
| Independent reflections           | 8665 [R(int) = 0.0748]                                       |                              |
| Completeness to theta = 27.50°    | 98.4 %                                                       |                              |
| Absorption correction             | Semi-empirical from equivalents                              |                              |
| Max. and min. transmission        | 0.7716 and 0.6388                                            |                              |
| Refinement method                 | Full-matrix least-squares on F <sup>2</sup>                  |                              |
| Data / restraints / parameters    | 8665 / 0 / 486                                               |                              |
| Goodness-of-fit on F <sup>2</sup> | 1.060                                                        |                              |
| Final R indices [I > 2σ(I)]       | R1 = 0.0523, wR2 = 0.0980                                    |                              |
| R indices (all data)              | R1 = 0.0811, wR2 = 0.1123                                    |                              |
| Largest diff. peak and hole       | 0.703 and -0.335 e.Å <sup>-3</sup>                           |                              |

**Table S11.** Atomic coordinates ( $\times 10^4$ ) and equivalent isotropic displacement parameters ( $\text{\AA}^2 \times 10^3$ ) for  $3^{i\text{-Pr}}$ .  $U(\text{eq})$  is defined as one third of the trace of the orthogonalized  $U_{ij}$  tensor.

|       | x        | y       | z       | U(eq) |
|-------|----------|---------|---------|-------|
| Ni(1) | 2604(1)  | 3538(1) | 7839(1) | 23(1) |
| Ni(2) | 2698(1)  | 4445(1) | 7508(1) | 23(1) |
| P(1)  | 3396(1)  | 2719(1) | 8110(1) | 24(1) |
| P(2)  | 3194(1)  | 5273(1) | 7901(1) | 34(1) |
| C(1)  | 3178(3)  | 3808(1) | 6886(2) | 22(1) |
| C(2)  | 4529(4)  | 4096(1) | 6896(2) | 26(1) |
| C(3)  | 5021(4)  | 4244(1) | 6200(2) | 32(1) |
| C(4)  | 4188(4)  | 4121(1) | 5477(2) | 34(1) |
| C(5)  | 2846(4)  | 3845(1) | 5441(2) | 29(1) |
| C(6)  | 2338(3)  | 3691(1) | 6114(2) | 23(1) |
| C(7)  | 954(3)   | 3362(1) | 6044(2) | 23(1) |
| C(8)  | 942(4)   | 2840(1) | 5745(2) | 30(1) |
| C(9)  | -283(4)  | 2508(1) | 5713(2) | 36(1) |
| C(10) | -1517(4) | 2689(2) | 5988(2) | 36(1) |
| C(11) | -1565(4) | 3213(1) | 6246(2) | 32(1) |
| C(12) | -358(4)  | 3557(1) | 6258(2) | 25(1) |
| C(13) | -629(3)  | 4145(1) | 6354(2) | 26(1) |
| C(14) | -998(4)  | 4438(1) | 5650(2) | 32(1) |
| C(15) | -1497(4) | 4960(1) | 5643(2) | 36(1) |
| C(16) | -1682(4) | 5196(1) | 6340(2) | 35(1) |
| C(17) | -1291(4) | 4921(1) | 7044(2) | 31(1) |
| C(18) | -725(3)  | 4398(1) | 7070(2) | 25(1) |
| C(19) | -187(4)  | 4135(1) | 7854(2) | 25(1) |
| C(20) | -1163(4) | 3942(1) | 8310(2) | 33(1) |
| C(21) | -653(4)  | 3729(2) | 9063(2) | 36(1) |
| C(22) | 838(4)   | 3713(1) | 9358(2) | 35(1) |
| C(23) | 1861(4)  | 3907(1) | 8907(2) | 30(1) |
| C(24) | 1388(4)  | 4131(1) | 8136(2) | 24(1) |
| C(25) | 4070(4)  | 2602(1) | 9190(2) | 35(1) |
| C(26) | 5038(5)  | 3065(2) | 9591(2) | 53(1) |
| C(27) | 4878(5)  | 2075(2) | 9421(2) | 53(1) |
| C(28) | 4900(4)  | 2437(1) | 7647(2) | 33(1) |

|        |          |          |          |       |
|--------|----------|----------|----------|-------|
| C(29)  | 4442(4)  | 2401(2)  | 6747(2)  | 45(1) |
| C(30)  | 6320(4)  | 2774(2)  | 7862(3)  | 49(1) |
| C(31)  | 1810(4)  | 2252(1)  | 7805(2)  | 31(1) |
| C(32)  | 509(4)   | 2405(2)  | 8202(3)  | 51(1) |
| C(33)  | 2103(4)  | 1648(1)  | 7884(3)  | 48(1) |
| C(34A) | 4772(9)  | 5320(3)  | 8739(5)  | 47(2) |
| C(35A) | 5656(15) | 5828(7)  | 8814(11) | 59(4) |
| C(36A) | 5760(30) | 4833(9)  | 8796(16) | 55(6) |
| C(34B) | 5337(11) | 5218(4)  | 8310(6)  | 36(3) |
| C(35B) | 6190(20) | 5713(12) | 8672(17) | 86(7) |
| C(36B) | 5540(40) | 4753(15) | 8930(20) | 63(9) |
| C(37)  | 3375(4)  | 5781(1)  | 7149(2)  | 38(1) |
| C(38)  | 1866(6)  | 5894(2)  | 6626(3)  | 74(2) |
| C(39)  | 4466(6)  | 5600(2)  | 6631(3)  | 81(2) |
| C(41A) | 1633(9)  | 5639(3)  | 8335(4)  | 28(2) |
| C(42A) | 1928(10) | 6219(5)  | 8582(8)  | 47(3) |
| C(43A) | 1340(20) | 5350(7)  | 9087(11) | 99(7) |
| C(41B) | 2510(20) | 5572(5)  | 8699(11) | 71(5) |
| C(42B) | 2700(20) | 6199(7)  | 8771(12) | 85(7) |
| C(43B) | 1101(14) | 5373(9)  | 8860(12) | 56(7) |

---

**Table S12.** Bond lengths [Å] and angles [°] for **3<sup>i</sup>-Pr**.

|             |            |              |          |
|-------------|------------|--------------|----------|
| Ni(1)-C(1)  | 1.930(3)   | C(9)-H(9)    | 0.9300   |
| Ni(1)-C(24) | 1.970(3)   | C(10)-C(11)  | 1.379(5) |
| Ni(1)-P(1)  | 2.1831(10) | C(10)-H(10)  | 0.9300   |
| Ni(1)-C(23) | 2.265(3)   | C(11)-C(12)  | 1.394(5) |
| Ni(1)-Ni(2) | 2.3352(6)  | C(11)-H(11)  | 0.9300   |
| Ni(2)-C(24) | 1.919(3)   | C(12)-C(13)  | 1.498(4) |
| Ni(2)-C(1)  | 2.006(3)   | C(13)-C(14)  | 1.397(4) |
| Ni(2)-P(2)  | 2.1905(10) | C(13)-C(18)  | 1.400(4) |
| Ni(2)-C(2)  | 2.302(3)   | C(14)-C(15)  | 1.378(5) |
| P(1)-C(28)  | 1.848(3)   | C(14)-H(14)  | 0.9300   |
| P(1)-C(31)  | 1.856(3)   | C(15)-C(16)  | 1.371(5) |
| P(1)-C(25)  | 1.864(3)   | C(15)-H(15)  | 0.9300   |
| P(2)-C(41B) | 1.773(11)  | C(16)-C(17)  | 1.377(5) |
| P(2)-C(37)  | 1.838(4)   | C(16)-H(16)  | 0.9300   |
| P(2)-C(34A) | 1.840(7)   | C(17)-C(18)  | 1.397(4) |
| P(2)-C(41A) | 1.952(8)   | C(17)-H(17)  | 0.9300   |
| P(2)-C(34B) | 1.956(10)  | C(18)-C(19)  | 1.495(4) |
| C(1)-C(2)   | 1.424(4)   | C(19)-C(20)  | 1.377(4) |
| C(1)-C(6)   | 1.432(4)   | C(19)-C(24)  | 1.429(4) |
| C(2)-C(3)   | 1.402(4)   | C(20)-C(21)  | 1.396(5) |
| C(2)-H(2)   | 0.9300     | C(20)-H(20)  | 0.9300   |
| C(3)-C(4)   | 1.364(5)   | C(21)-C(22)  | 1.361(5) |
| C(3)-H(3)   | 0.9300     | C(21)-H(21)  | 0.9300   |
| C(4)-C(5)   | 1.395(5)   | C(22)-C(23)  | 1.405(5) |
| C(4)-H(4)   | 0.9300     | C(22)-H(22)  | 0.9300   |
| C(5)-C(6)   | 1.376(4)   | C(23)-C(24)  | 1.426(4) |
| C(5)-H(5)   | 0.9300     | C(23)-H(23)  | 0.9300   |
| C(6)-C(7)   | 1.492(4)   | C(25)-C(27)  | 1.520(5) |
| C(7)-C(8)   | 1.398(4)   | C(25)-C(26)  | 1.536(5) |
| C(7)-C(12)  | 1.403(4)   | C(25)-H(25)  | 0.9800   |
| C(8)-C(9)   | 1.384(5)   | C(26)-H(26A) | 0.9600   |
| C(8)-H(8)   | 0.9300     | C(26)-H(26B) | 0.9600   |
| C(9)-C(10)  | 1.374(5)   | C(26)-H(26C) | 0.9600   |



|               |          |                  |            |
|---------------|----------|------------------|------------|
| C(27)-H(27A)  | 0.9600   | C(35B)-H(35F)    | 0.9600     |
| C(27)-H(27B)  | 0.9600   | C(36B)-H(36D)    | 0.9600     |
| C(27)-H(27C)  | 0.9600   | C(36B)-H(36E)    | 0.9600     |
| C(28)-C(29)   | 1.526(5) | C(36B)-H(36F)    | 0.9600     |
| C(28)-C(30)   | 1.530(5) | C(37)-C(39)      | 1.521(5)   |
| C(28)-H(28)   | 0.9800   | C(37)-C(38)      | 1.524(6)   |
| C(29)-H(29A)  | 0.9600   | C(37)-H(37)      | 0.9800     |
| C(29)-H(29B)  | 0.9600   | C(38)-H(38A)     | 0.9600     |
| C(29)-H(29C)  | 0.9600   | C(38)-H(38B)     | 0.9600     |
| C(30)-H(30A)  | 0.9600   | C(38)-H(38C)     | 0.9600     |
| C(30)-H(30B)  | 0.9600   | C(39)-H(39A)     | 0.9600     |
| C(30)-H(30C)  | 0.9600   | C(39)-H(39B)     | 0.9600     |
| C(31)-C(32)   | 1.524(5) | C(39)-H(39C)     | 0.9600     |
| C(31)-C(33)   | 1.529(5) | C(41A)-C(42A)    | 1.517(13)  |
| C(31)-H(31)   | 0.9800   | C(41A)-C(43A)    | 1.543(19)  |
| C(32)-H(32A)  | 0.9600   | C(41A)-H(41A)    | 0.9800     |
| C(32)-H(32B)  | 0.9600   | C(42A)-H(42A)    | 0.9600     |
| C(32)-H(32C)  | 0.9600   | C(42A)-H(42B)    | 0.9600     |
| C(33)-H(33A)  | 0.9600   | C(42A)-H(42C)    | 0.9600     |
| C(33)-H(33B)  | 0.9600   | C(43A)-H(43A)    | 0.9600     |
| C(33)-H(33C)  | 0.9600   | C(43A)-H(43B)    | 0.9600     |
| C(34A)-C(35A) | 1.49(2)  | C(43A)-H(43C)    | 0.9600     |
| C(34A)-C(36A) | 1.50(2)  | C(41B)-C(43B)    | 1.45(2)    |
| C(34A)-H(34A) | 0.9800   | C(41B)-C(42B)    | 1.57(2)    |
| C(35A)-H(35A) | 0.9600   | C(41B)-H(41B)    | 0.9800     |
| C(35A)-H(35B) | 0.9600   | C(42B)-H(42D)    | 0.9600     |
| C(35A)-H(35C) | 0.9600   | C(42B)-H(42E)    | 0.9600     |
| C(36A)-H(36A) | 0.9600   | C(42B)-H(42F)    | 0.9600     |
| C(36A)-H(36B) | 0.9600   | C(43B)-H(43D)    | 0.9600     |
| C(36A)-H(36C) | 0.9600   | C(43B)-H(43E)    | 0.9600     |
| C(34B)-C(35B) | 1.52(3)  | C(43B)-H(43F)    | 0.9600     |
| C(34B)-C(36B) | 1.56(4)  |                  |            |
| C(34B)-H(34B) | 0.9800   | C(1)-Ni(1)-C(24) | 102.29(13) |
| C(35B)-H(35D) | 0.9600   | C(1)-Ni(1)-P(1)  | 112.02(9)  |
| C(35B)-H(35E) | 0.9600   | C(24)-Ni(1)-P(1) | 145.53(10) |

|                    |            |                   |           |
|--------------------|------------|-------------------|-----------|
| C(1)-Ni(1)-C(23)   | 135.56(12) | C(34A)-P(2)-Ni(2) | 112.8(2)  |
| C(24)-Ni(1)-C(23)  | 38.57(12)  | C(41A)-P(2)-Ni(2) | 115.7(2)  |
| P(1)-Ni(1)-C(23)   | 110.10(9)  | C(34B)-P(2)-Ni(2) | 100.4(3)  |
| C(1)-Ni(1)-Ni(2)   | 55.12(9)   | C(2)-C(1)-C(6)    | 115.3(3)  |
| C(24)-Ni(1)-Ni(2)  | 52.11(9)   | C(2)-C(1)-Ni(1)   | 122.4(2)  |
| P(1)-Ni(1)-Ni(2)   | 158.31(3)  | C(6)-C(1)-Ni(1)   | 122.1(2)  |
| C(23)-Ni(1)-Ni(2)  | 80.44(8)   | C(2)-C(1)-Ni(2)   | 82.44(19) |
| C(24)-Ni(2)-C(1)   | 101.36(13) | C(6)-C(1)-Ni(2)   | 121.4(2)  |
| C(24)-Ni(2)-P(2)   | 108.98(10) | Ni(1)-C(1)-Ni(2)  | 72.77(11) |
| C(1)-Ni(2)-P(2)    | 148.83(9)  | C(3)-C(2)-C(1)    | 122.4(3)  |
| C(24)-Ni(2)-C(2)   | 133.10(12) | C(3)-C(2)-Ni(2)   | 131.7(2)  |
| C(1)-Ni(2)-C(2)    | 37.83(11)  | C(1)-C(2)-Ni(2)   | 59.73(16) |
| P(2)-Ni(2)-C(2)    | 111.69(9)  | C(3)-C(2)-H(2)    | 118.8     |
| C(24)-Ni(2)-Ni(1)  | 54.10(9)   | C(1)-C(2)-H(2)    | 118.8     |
| C(1)-Ni(2)-Ni(1)   | 52.11(9)   | Ni(2)-C(2)-H(2)   | 80.4      |
| P(2)-Ni(2)-Ni(1)   | 148.26(3)  | C(4)-C(3)-C(2)    | 120.2(3)  |
| C(2)-Ni(2)-Ni(1)   | 78.99(8)   | C(4)-C(3)-H(3)    | 119.9     |
| C(28)-P(1)-C(31)   | 104.01(16) | C(2)-C(3)-H(3)    | 119.9     |
| C(28)-P(1)-C(25)   | 103.50(16) | C(3)-C(4)-C(5)    | 119.1(3)  |
| C(31)-P(1)-C(25)   | 106.15(16) | C(3)-C(4)-H(4)    | 120.4     |
| C(28)-P(1)-Ni(1)   | 120.43(12) | C(5)-C(4)-H(4)    | 120.4     |
| C(31)-P(1)-Ni(1)   | 108.39(11) | C(6)-C(5)-C(4)    | 122.0(3)  |
| C(25)-P(1)-Ni(1)   | 113.20(12) | C(6)-C(5)-H(5)    | 119.0     |
| C(41B)-P(2)-C(37)  | 110.2(5)   | C(4)-C(5)-H(5)    | 119.0     |
| C(41B)-P(2)-C(34A) | 73.0(7)    | C(5)-C(6)-C(1)    | 120.9(3)  |
| C(37)-P(2)-C(34A)  | 110.2(3)   | C(5)-C(6)-C(7)    | 119.9(3)  |
| C(41B)-P(2)-C(41A) | 28.5(6)    | C(1)-C(6)-C(7)    | 119.0(3)  |
| C(37)-P(2)-C(41A)  | 96.5(3)    | C(8)-C(7)-C(12)   | 118.1(3)  |
| C(34A)-P(2)-C(41A) | 101.1(3)   | C(8)-C(7)-C(6)    | 119.3(3)  |
| C(41B)-P(2)-C(34B) | 103.1(7)   | C(12)-C(7)-C(6)   | 122.7(3)  |
| C(37)-P(2)-C(34B)  | 94.9(3)    | C(9)-C(8)-C(7)    | 121.4(3)  |
| C(34A)-P(2)-C(34B) | 30.5(3)    | C(9)-C(8)-H(8)    | 119.3     |
| C(41A)-P(2)-C(34B) | 130.4(4)   | C(7)-C(8)-H(8)    | 119.3     |
| C(41B)-P(2)-Ni(2)  | 123.4(4)   | C(10)-C(9)-C(8)   | 119.8(3)  |
| C(37)-P(2)-Ni(2)   | 118.18(12) | C(10)-C(9)-H(9)   | 120.1     |

|                   |          |                     |           |
|-------------------|----------|---------------------|-----------|
| C(8)-C(9)-H(9)    | 120.1    | C(22)-C(21)-H(21)   | 120.2     |
| C(9)-C(10)-C(11)  | 119.8(3) | C(20)-C(21)-H(21)   | 120.2     |
| C(9)-C(10)-H(10)  | 120.1    | C(21)-C(22)-C(23)   | 120.4(3)  |
| C(11)-C(10)-H(10) | 120.1    | C(21)-C(22)-H(22)   | 119.8     |
| C(10)-C(11)-C(12) | 121.0(3) | C(23)-C(22)-H(22)   | 119.8     |
| C(10)-C(11)-H(11) | 119.5    | C(22)-C(23)-C(24)   | 121.9(3)  |
| C(12)-C(11)-H(11) | 119.5    | C(22)-C(23)-Ni(1)   | 129.4(2)  |
| C(11)-C(12)-C(7)  | 119.5(3) | C(24)-C(23)-Ni(1)   | 59.45(17) |
| C(11)-C(12)-C(13) | 117.2(3) | C(22)-C(23)-H(23)   | 119.1     |
| C(7)-C(12)-C(13)  | 122.2(3) | C(24)-C(23)-H(23)   | 119.1     |
| C(14)-C(13)-C(18) | 118.7(3) | Ni(1)-C(23)-H(23)   | 82.5      |
| C(14)-C(13)-C(12) | 115.7(3) | C(23)-C(24)-C(19)   | 115.4(3)  |
| C(18)-C(13)-C(12) | 125.1(3) | C(23)-C(24)-Ni(2)   | 124.6(2)  |
| C(15)-C(14)-C(13) | 121.7(3) | C(19)-C(24)-Ni(2)   | 119.9(2)  |
| C(15)-C(14)-H(14) | 119.1    | C(23)-C(24)-Ni(1)   | 81.98(19) |
| C(13)-C(14)-H(14) | 119.1    | C(19)-C(24)-Ni(1)   | 119.8(2)  |
| C(16)-C(15)-C(14) | 119.4(3) | Ni(2)-C(24)-Ni(1)   | 73.78(11) |
| C(16)-C(15)-H(15) | 120.3    | C(27)-C(25)-C(26)   | 108.7(3)  |
| C(14)-C(15)-H(15) | 120.3    | C(27)-C(25)-P(1)    | 116.7(3)  |
| C(15)-C(16)-C(17) | 119.9(3) | C(26)-C(25)-P(1)    | 112.5(3)  |
| C(15)-C(16)-H(16) | 120.1    | C(27)-C(25)-H(25)   | 106.1     |
| C(17)-C(16)-H(16) | 120.1    | C(26)-C(25)-H(25)   | 106.1     |
| C(16)-C(17)-C(18) | 121.8(3) | P(1)-C(25)-H(25)    | 106.1     |
| C(16)-C(17)-H(17) | 119.1    | C(25)-C(26)-H(26A)  | 109.5     |
| C(18)-C(17)-H(17) | 119.1    | C(25)-C(26)-H(26B)  | 109.5     |
| C(17)-C(18)-C(13) | 118.3(3) | H(26A)-C(26)-H(26B) | 109.5     |
| C(17)-C(18)-C(19) | 119.7(3) | C(25)-C(26)-H(26C)  | 109.5     |
| C(13)-C(18)-C(19) | 122.0(3) | H(26A)-C(26)-H(26C) | 109.5     |
| C(20)-C(19)-C(24) | 121.4(3) | H(26B)-C(26)-H(26C) | 109.5     |
| C(20)-C(19)-C(18) | 121.7(3) | C(25)-C(27)-H(27A)  | 109.5     |
| C(24)-C(19)-C(18) | 116.7(3) | C(25)-C(27)-H(27B)  | 109.5     |
| C(19)-C(20)-C(21) | 121.3(3) | H(27A)-C(27)-H(27B) | 109.5     |
| C(19)-C(20)-H(20) | 119.3    | C(25)-C(27)-H(27C)  | 109.5     |
| C(21)-C(20)-H(20) | 119.3    | H(27A)-C(27)-H(27C) | 109.5     |
| C(22)-C(21)-C(20) | 119.6(3) | H(27B)-C(27)-H(27C) | 109.5     |

|                     |          |                      |           |
|---------------------|----------|----------------------|-----------|
| C(29)-C(28)-C(30)   | 109.6(3) | H(33B)-C(33)-H(33C)  | 109.5     |
| C(29)-C(28)-P(1)    | 111.8(2) | C(35A)-C(34A)-C(36A) | 111.7(13) |
| C(30)-C(28)-P(1)    | 110.6(3) | C(35A)-C(34A)-P(2)   | 116.9(9)  |
| C(29)-C(28)-H(28)   | 108.2    | C(36A)-C(34A)-P(2)   | 111.8(11) |
| C(30)-C(28)-H(28)   | 108.2    | C(35A)-C(34A)-H(34A) | 105.0     |
| P(1)-C(28)-H(28)    | 108.2    | C(36A)-C(34A)-H(34A) | 105.0     |
| C(28)-C(29)-H(29A)  | 109.5    | P(2)-C(34A)-H(34A)   | 105.0     |
| C(28)-C(29)-H(29B)  | 109.5    | C(35B)-C(34B)-C(36B) | 109.5(19) |
| H(29A)-C(29)-H(29B) | 109.5    | C(35B)-C(34B)-P(2)   | 119.3(11) |
| C(28)-C(29)-H(29C)  | 109.5    | C(36B)-C(34B)-P(2)   | 106.5(14) |
| H(29A)-C(29)-H(29C) | 109.5    | C(35B)-C(34B)-H(34B) | 107.0     |
| H(29B)-C(29)-H(29C) | 109.5    | C(36B)-C(34B)-H(34B) | 107.0     |
| C(28)-C(30)-H(30A)  | 109.5    | P(2)-C(34B)-H(34B)   | 107.0     |
| C(28)-C(30)-H(30B)  | 109.5    | C(34B)-C(35B)-H(35D) | 109.5     |
| H(30A)-C(30)-H(30B) | 109.5    | C(34B)-C(35B)-H(35E) | 109.5     |
| C(28)-C(30)-H(30C)  | 109.5    | H(35D)-C(35B)-H(35E) | 109.5     |
| H(30A)-C(30)-H(30C) | 109.5    | C(34B)-C(35B)-H(35F) | 109.5     |
| H(30B)-C(30)-H(30C) | 109.5    | H(35D)-C(35B)-H(35F) | 109.5     |
| C(32)-C(31)-C(33)   | 110.1(3) | H(35E)-C(35B)-H(35F) | 109.5     |
| C(32)-C(31)-P(1)    | 110.4(2) | C(34B)-C(36B)-H(36D) | 109.5     |
| C(33)-C(31)-P(1)    | 118.5(3) | C(34B)-C(36B)-H(36E) | 109.5     |
| C(32)-C(31)-H(31)   | 105.6    | H(36D)-C(36B)-H(36E) | 109.5     |
| C(33)-C(31)-H(31)   | 105.6    | C(34B)-C(36B)-H(36F) | 109.5     |
| P(1)-C(31)-H(31)    | 105.6    | H(36D)-C(36B)-H(36F) | 109.5     |
| C(31)-C(32)-H(32A)  | 109.5    | H(36E)-C(36B)-H(36F) | 109.5     |
| C(31)-C(32)-H(32B)  | 109.5    | C(39)-C(37)-C(38)    | 109.2(4)  |
| H(32A)-C(32)-H(32B) | 109.5    | C(39)-C(37)-P(2)     | 111.1(3)  |
| C(31)-C(32)-H(32C)  | 109.5    | C(38)-C(37)-P(2)     | 110.6(3)  |
| H(32A)-C(32)-H(32C) | 109.5    | C(39)-C(37)-H(37)    | 108.6     |
| H(32B)-C(32)-H(32C) | 109.5    | C(38)-C(37)-H(37)    | 108.6     |
| C(31)-C(33)-H(33A)  | 109.5    | P(2)-C(37)-H(37)     | 108.6     |
| C(31)-C(33)-H(33B)  | 109.5    | C(37)-C(38)-H(38A)   | 109.5     |
| H(33A)-C(33)-H(33B) | 109.5    | C(37)-C(38)-H(38B)   | 109.5     |
| C(31)-C(33)-H(33C)  | 109.5    | H(38A)-C(38)-H(38B)  | 109.5     |
| H(33A)-C(33)-H(33C) | 109.5    | C(37)-C(38)-H(38C)   | 109.5     |

|                      |           |                      |           |
|----------------------|-----------|----------------------|-----------|
| H(38A)-C(38)-H(38C)  | 109.5     | C(42B)-C(41B)-P(2)   | 115.3(10) |
| H(38B)-C(38)-H(38C)  | 109.5     | C(43B)-C(41B)-H(41B) | 102.2     |
| C(37)-C(39)-H(39A)   | 109.5     | C(42B)-C(41B)-H(41B) | 102.2     |
| C(37)-C(39)-H(39B)   | 109.5     | P(2)-C(41B)-H(41B)   | 102.2     |
| H(39A)-C(39)-H(39B)  | 109.5     | C(41B)-C(42B)-H(42D) | 109.5     |
| C(37)-C(39)-H(39C)   | 109.5     | C(41B)-C(42B)-H(42E) | 109.5     |
| H(39A)-C(39)-H(39C)  | 109.5     | H(42D)-C(42B)-H(42E) | 109.5     |
| H(39B)-C(39)-H(39C)  | 109.5     | C(41B)-C(42B)-H(42F) | 109.5     |
| C(42A)-C(41A)-C(43A) | 105.0(9)  | H(42D)-C(42B)-H(42F) | 109.5     |
| C(42A)-C(41A)-P(2)   | 116.6(6)  | H(42E)-C(42B)-H(42F) | 109.5     |
| C(43A)-C(41A)-P(2)   | 110.7(8)  | C(41B)-C(43B)-H(43D) | 109.5     |
| C(42A)-C(41A)-H(41A) | 108.1     | C(41B)-C(43B)-H(43E) | 109.5     |
| C(43A)-C(41A)-H(41A) | 108.1     | H(43D)-C(43B)-H(43E) | 109.5     |
| P(2)-C(41A)-H(41A)   | 108.1     | C(41B)-C(43B)-H(43F) | 109.5     |
| C(43B)-C(41B)-C(42B) | 114.4(13) | H(43D)-C(43B)-H(43F) | 109.5     |
| C(43B)-C(41B)-P(2)   | 117.3(12) | H(43E)-C(43B)-H(43F) | 109.5     |

---

Symmetry transformations used to generate equivalent atoms:

**Table S13.** Anisotropic displacement parameters ( $\text{\AA}^2 \times 10^3$ ) for  $\mathbf{3}^{i\text{-Pr}}$ . The anisotropic displacement factor exponent takes the form:  $-2\pi^2 [h^2 a^{*2} U^{11} + \dots + 2 h k a^* b^* U^{12}]$

|       | U <sup>11</sup> | U <sup>22</sup> | U <sup>33</sup> | U <sup>23</sup> | U <sup>13</sup> | U <sup>12</sup> |
|-------|-----------------|-----------------|-----------------|-----------------|-----------------|-----------------|
| Ni(1) | 25(1)           | 20(1)           | 24(1)           | 2(1)            | 6(1)            | 1(1)            |
| Ni(2) | 26(1)           | 19(1)           | 25(1)           | 0(1)            | 7(1)            | -1(1)           |
| P(1)  | 25(1)           | 21(1)           | 27(1)           | 4(1)            | 6(1)            | 1(1)            |
| P(2)  | 45(1)           | 24(1)           | 32(1)           | -4(1)           | 6(1)            | -9(1)           |
| C(1)  | 24(2)           | 18(2)           | 26(2)           | 2(1)            | 8(1)            | 4(1)            |
| C(2)  | 26(2)           | 23(2)           | 30(2)           | -4(1)           | 7(1)            | 0(1)            |
| C(3)  | 32(2)           | 22(2)           | 46(2)           | 0(2)            | 17(2)           | -3(1)           |
| C(4)  | 41(2)           | 33(2)           | 34(2)           | 2(2)            | 21(2)           | 3(2)            |
| C(5)  | 33(2)           | 31(2)           | 25(2)           | 1(1)            | 9(1)            | 4(2)            |
| C(6)  | 23(2)           | 20(2)           | 26(2)           | -1(1)           | 6(1)            | 5(1)            |
| C(7)  | 26(2)           | 24(2)           | 20(2)           | -2(1)           | 3(1)            | 0(1)            |
| C(8)  | 33(2)           | 28(2)           | 30(2)           | -6(1)           | 7(2)            | 5(2)            |
| C(9)  | 43(2)           | 27(2)           | 35(2)           | -7(2)           | 4(2)            | -3(2)           |
| C(10) | 31(2)           | 37(2)           | 40(2)           | -5(2)           | 2(2)            | -11(2)          |
| C(11) | 30(2)           | 33(2)           | 33(2)           | -1(2)           | 6(2)            | 2(2)            |
| C(12) | 29(2)           | 26(2)           | 20(2)           | -1(1)           | 1(1)            | 0(1)            |
| C(13) | 20(2)           | 24(2)           | 33(2)           | 1(1)            | 5(1)            | 1(1)            |
| C(14) | 30(2)           | 37(2)           | 29(2)           | 3(2)            | 5(2)            | 2(2)            |
| C(15) | 34(2)           | 34(2)           | 40(2)           | 13(2)           | 9(2)            | 4(2)            |
| C(16) | 30(2)           | 23(2)           | 52(2)           | 6(2)            | 7(2)            | 3(2)            |
| C(17) | 25(2)           | 26(2)           | 41(2)           | -2(2)           | 7(2)            | 2(1)            |
| C(18) | 18(2)           | 24(2)           | 33(2)           | 1(1)            | 7(1)            | 0(1)            |
| C(19) | 27(2)           | 19(2)           | 29(2)           | -4(1)           | 7(1)            | 1(1)            |
| C(20) | 27(2)           | 36(2)           | 40(2)           | -3(2)           | 11(2)           | -1(2)           |
| C(21) | 38(2)           | 42(2)           | 32(2)           | 2(2)            | 18(2)           | -5(2)           |
| C(22) | 48(2)           | 35(2)           | 24(2)           | 5(2)            | 10(2)           | -1(2)           |
| C(23) | 29(2)           | 30(2)           | 30(2)           | -1(1)           | 5(2)            | 2(1)            |
| C(24) | 27(2)           | 20(2)           | 26(2)           | 0(1)            | 9(1)            | 1(1)            |
| C(25) | 35(2)           | 40(2)           | 28(2)           | 11(2)           | 4(2)            | 2(2)            |
| C(26) | 60(3)           | 45(3)           | 44(2)           | -2(2)           | -17(2)          | 12(2)           |

|        |         |         |         |         |         |         |
|--------|---------|---------|---------|---------|---------|---------|
| C(27)  | 67(3)   | 42(2)   | 44(2)   | 15(2)   | -4(2)   | -1(2)   |
| C(28)  | 32(2)   | 28(2)   | 42(2)   | 4(2)    | 12(2)   | 9(2)    |
| C(29)  | 49(2)   | 45(2)   | 44(2)   | 0(2)    | 20(2)   | 12(2)   |
| C(30)  | 34(2)   | 56(3)   | 61(3)   | 8(2)    | 18(2)   | 3(2)    |
| C(31)  | 31(2)   | 25(2)   | 35(2)   | 3(2)    | 6(2)    | -5(1)   |
| C(32)  | 31(2)   | 47(3)   | 79(3)   | -10(2)  | 19(2)   | -9(2)   |
| C(33)  | 42(2)   | 25(2)   | 76(3)   | -1(2)   | 8(2)    | -7(2)   |
| C(34A) | 45(5)   | 53(5)   | 37(5)   | -8(4)   | -6(4)   | -1(4)   |
| C(35A) | 44(8)   | 53(6)   | 69(8)   | -19(5)  | -15(7)  | -9(6)   |
| C(36A) | 43(8)   | 55(9)   | 66(13)  | -22(10) | 8(7)    | -3(7)   |
| C(34B) | 41(6)   | 49(6)   | 17(5)   | -11(4)  | 1(4)    | -17(4)  |
| C(35B) | 58(14)  | 100(20) | 93(14)  | -11(12) | -2(13)  | -37(12) |
| C(36B) | 41(13)  | 87(15)  | 51(11)  | 18(9)   | -16(11) | -4(10)  |
| C(37)  | 49(2)   | 21(2)   | 48(2)   | -3(2)   | 17(2)   | -7(2)   |
| C(38)  | 98(4)   | 51(3)   | 65(3)   | 12(2)   | -9(3)   | 5(3)    |
| C(39)  | 119(5)  | 45(3)   | 103(4)  | -10(3)  | 83(4)   | -17(3)  |
| C(41A) | 34(4)   | 28(4)   | 22(4)   | -7(3)   | 4(3)    | 5(3)    |
| C(42A) | 36(5)   | 35(4)   | 71(6)   | -18(4)  | 11(5)   | -4(5)   |
| C(43A) | 205(19) | 38(7)   | 77(11)  | -18(6)  | 85(11)  | -22(9)  |
| C(41B) | 118(14) | 32(6)   | 80(11)  | -17(7)  | 58(10)  | -9(8)   |
| C(42B) | 100(14) | 60(9)   | 120(16) | -52(10) | 86(14)  | -38(11) |
| C(43B) | 12(5)   | 83(13)  | 73(13)  | -56(10) | 8(6)    | 5(5)    |

---

## Tables of Crystallographic Data for 4<sup>i</sup>Pr.

**Table S14.** Crystal data and structure refinement for 4<sup>i</sup>Pr.

|                                   |                                                                |                   |
|-----------------------------------|----------------------------------------------------------------|-------------------|
| Empirical formula                 | C <sub>42</sub> H <sub>58</sub> Ni <sub>2</sub> P <sub>2</sub> |                   |
| Formula weight                    | 742.24                                                         |                   |
| Temperature                       | 173(2) K                                                       |                   |
| Wavelength                        | 0.71073 Å                                                      |                   |
| Crystal system                    | Triclinic                                                      |                   |
| Space group                       | P-1                                                            |                   |
| Unit cell dimensions              | a = 11.0185(14) Å                                              | α = 83.4740(10)°. |
|                                   | b = 12.6516(17) Å                                              | β = 70.9050(10)°. |
|                                   | c = 15.558(2) Å                                                | γ = 68.1500(10)°. |
| Volume                            | 1902.2(4) Å <sup>3</sup>                                       |                   |
| Z                                 | 2                                                              |                   |
| Density (calculated)              | 1.296 Mg/m <sup>3</sup>                                        |                   |
| Absorption coefficient            | 1.102 mm <sup>-1</sup>                                         |                   |
| F(000)                            | 792                                                            |                   |
| Crystal size                      | 0.21 x 0.10 x 0.08 mm <sup>3</sup>                             |                   |
| Theta range for data collection   | 2.23 to 26.37°.                                                |                   |
| Index ranges                      | -13 ≤ h ≤ 13, -15 ≤ k ≤ 15, -19 ≤ l ≤ 19                       |                   |
| Reflections collected             | 20027                                                          |                   |
| Independent reflections           | 7736 [R(int) = 0.0371]                                         |                   |
| Completeness to theta = 26.37°    | 99.3 %                                                         |                   |
| Absorption correction             | Semi-empirical from equivalents                                |                   |
| Max. and min. transmission        | 0.9170 and 0.8016                                              |                   |
| Refinement method                 | Full-matrix least-squares on F <sup>2</sup>                    |                   |
| Data / restraints / parameters    | 7736 / 0 / 427                                                 |                   |
| Goodness-of-fit on F <sup>2</sup> | 1.093                                                          |                   |
| Final R indices [I > 2σ(I)]       | R1 = 0.0450, wR2 = 0.0889                                      |                   |
| R indices (all data)              | R1 = 0.0582, wR2 = 0.0960                                      |                   |
| Largest diff. peak and hole       | 0.567 and -0.349 e.Å <sup>-3</sup>                             |                   |



**Table S15.** Atomic coordinates ( $\times 10^4$ ) and equivalent isotropic displacement parameters ( $\text{\AA}^2 \times 10^3$ ) for  $4^{i\text{-Pr}}$ .  $U(\text{eq})$  is defined as one third of the trace of the orthogonalized  $U_{ij}$  tensor.

|       | x        | y        | z       | $U(\text{eq})$ |
|-------|----------|----------|---------|----------------|
| Ni(1) | 209(1)   | 8159(1)  | 2673(1) | 23(1)          |
| Ni(2) | 1646(1)  | 6232(1)  | 2596(1) | 25(1)          |
| P(1)  | -1459(1) | 9893(1)  | 3017(1) | 24(1)          |
| P(2)  | 2898(1)  | 4460(1)  | 2178(1) | 28(1)          |
| C(1)  | 1460(3)  | 7387(2)  | 3399(2) | 26(1)          |
| C(2)  | 1264(3)  | 6652(2)  | 4141(2) | 27(1)          |
| C(3)  | 2135(3)  | 6328(3)  | 4686(2) | 32(1)          |
| C(4)  | 3190(3)  | 6727(3)  | 4508(2) | 34(1)          |
| C(5)  | 3420(3)  | 7449(3)  | 3772(2) | 32(1)          |
| C(6)  | 2580(3)  | 7781(2)  | 3219(2) | 28(1)          |
| C(7)  | 2732(3)  | 8504(3)  | 2412(2) | 28(1)          |
| C(8)  | 3850(3)  | 8855(3)  | 2017(2) | 39(1)          |
| C(9)  | 3925(4)  | 9506(3)  | 1234(2) | 43(1)          |
| C(10) | 2891(3)  | 9779(3)  | 839(2)  | 38(1)          |
| C(11) | 1794(3)  | 9408(3)  | 1220(2) | 31(1)          |
| C(12) | 1656(3)  | 8790(2)  | 2029(2) | 27(1)          |
| C(13) | 1101(3)  | 6808(2)  | 1535(2) | 25(1)          |
| C(14) | 2017(3)  | 6935(2)  | 690(2)  | 32(1)          |
| C(15) | 1642(3)  | 7138(3)  | -95(2)  | 36(1)          |
| C(16) | 335(4)   | 7230(3)  | -65(2)  | 44(1)          |
| C(17) | -592(3)  | 7125(3)  | 753(2)  | 38(1)          |
| C(18) | -229(3)  | 6915(2)  | 1550(2) | 28(1)          |
| C(19) | -1177(3) | 6802(2)  | 2455(2) | 29(1)          |
| C(20) | -2100(3) | 6233(3)  | 2604(2) | 36(1)          |
| C(21) | -2914(3) | 6132(3)  | 3477(2) | 40(1)          |
| C(22) | -2795(3) | 6590(3)  | 4194(2) | 37(1)          |
| C(23) | -1887(3) | 7163(2)  | 4050(2) | 31(1)          |
| C(24) | -1058(3) | 7298(2)  | 3177(2) | 26(1)          |
| C(25) | -794(3)  | 11078(3) | 2852(2) | 32(1)          |
| C(26) | 43(3)    | 10986(3) | 3495(2) | 41(1)          |

|       |          |          |         |       |
|-------|----------|----------|---------|-------|
| C(27) | -1791(4) | 12295(3) | 2833(2) | 42(1) |
| C(28) | -2646(3) | 9960(3)  | 4188(2) | 29(1) |
| C(29) | -1906(4) | 9665(3)  | 4913(2) | 42(1) |
| C(30) | -3922(3) | 11051(3) | 4458(2) | 42(1) |
| C(31) | -2639(3) | 10327(3) | 2315(2) | 32(1) |
| C(32) | -3556(3) | 9617(3)  | 2489(2) | 40(1) |
| C(33) | -1831(4) | 10288(3) | 1307(2) | 43(1) |
| C(34) | 4707(3)  | 4213(3)  | 2052(2) | 34(1) |
| C(35) | 5195(4)  | 5048(3)  | 1362(3) | 49(1) |
| C(36) | 4894(4)  | 4353(3)  | 2957(3) | 49(1) |
| C(37) | 2430(4)  | 3484(3)  | 3093(3) | 46(1) |
| C(38) | 922(4)   | 3740(3)  | 3478(3) | 54(1) |
| C(39) | 3275(4)  | 2212(3)  | 2901(3) | 51(1) |
| C(40) | 2969(4)  | 4003(3)  | 1069(2) | 37(1) |
| C(41) | 1593(4)  | 3930(3)  | 1104(3) | 61(1) |
| C(42) | 4162(4)  | 2920(3)  | 622(2)  | 51(1) |

---

**Table S16.** Bond lengths [Å] and angles [°] for **4<sup>i</sup>-Pr**.

|             |           |              |          |
|-------------|-----------|--------------|----------|
| Ni(1)-C(1)  | 1.974(3)  | C(10)-C(11)  | 1.386(4) |
| Ni(1)-C(12) | 1.975(3)  | C(10)-H(10)  | 0.9500   |
| Ni(1)-C(24) | 1.993(3)  | C(11)-C(12)  | 1.400(4) |
| Ni(1)-P(1)  | 2.2581(8) | C(11)-H(11)  | 0.9500   |
| Ni(1)-C(13) | 2.306(3)  | C(13)-C(14)  | 1.406(4) |
| Ni(1)-Ni(2) | 2.3521(6) | C(13)-C(18)  | 1.414(4) |
| Ni(2)-C(13) | 1.915(3)  | C(14)-C(15)  | 1.381(4) |
| Ni(2)-C(1)  | 1.941(3)  | C(14)-H(14)  | 0.9500   |
| Ni(2)-P(2)  | 2.1897(9) | C(15)-C(16)  | 1.386(5) |
| Ni(2)-C(2)  | 2.388(3)  | C(15)-H(15)  | 0.9500   |
| P(1)-C(28)  | 1.852(3)  | C(16)-C(17)  | 1.376(5) |
| P(1)-C(31)  | 1.857(3)  | C(16)-H(16)  | 0.9500   |
| P(1)-C(25)  | 1.860(3)  | C(17)-C(18)  | 1.394(4) |
| P(2)-C(34)  | 1.845(3)  | C(17)-H(17)  | 0.9500   |
| P(2)-C(37)  | 1.847(3)  | C(18)-C(19)  | 1.483(4) |
| P(2)-C(40)  | 1.849(3)  | C(19)-C(20)  | 1.399(4) |
| C(1)-C(2)   | 1.410(4)  | C(19)-C(24)  | 1.411(4) |
| C(1)-C(6)   | 1.432(4)  | C(20)-C(21)  | 1.385(5) |
| C(2)-C(3)   | 1.403(4)  | C(20)-H(20)  | 0.9500   |
| C(2)-H(2)   | 0.9500    | C(21)-C(22)  | 1.377(5) |
| C(3)-C(4)   | 1.371(4)  | C(21)-H(21)  | 0.9500   |
| C(3)-H(3)   | 0.9500    | C(22)-C(23)  | 1.391(4) |
| C(4)-C(5)   | 1.397(4)  | C(22)-H(22)  | 0.9500   |
| C(4)-H(4)   | 0.9500    | C(23)-C(24)  | 1.400(4) |
| C(5)-C(6)   | 1.387(4)  | C(23)-H(23)  | 0.9500   |
| C(5)-H(5)   | 0.9500    | C(25)-C(27)  | 1.526(4) |
| C(6)-C(7)   | 1.469(4)  | C(25)-C(26)  | 1.536(4) |
| C(7)-C(8)   | 1.394(4)  | C(25)-H(25)  | 1.0000   |
| C(7)-C(12)  | 1.409(4)  | C(26)-H(26A) | 0.9800   |
| C(8)-C(9)   | 1.387(5)  | C(26)-H(26B) | 0.9800   |
| C(8)-H(8)   | 0.9500    | C(26)-H(26C) | 0.9800   |
| C(9)-C(10)  | 1.383(5)  | C(27)-H(27A) | 0.9800   |
| C(9)-H(9)   | 0.9500    | C(27)-H(27B) | 0.9800   |

|              |          |                   |            |
|--------------|----------|-------------------|------------|
| C(27)-H(27C) | 0.9800   | C(39)-H(39B)      | 0.9800     |
| C(28)-C(29)  | 1.534(4) | C(39)-H(39C)      | 0.9800     |
| C(28)-C(30)  | 1.537(4) | C(40)-C(41)       | 1.536(5)   |
| C(28)-H(28)  | 1.0000   | C(40)-C(42)       | 1.539(5)   |
| C(29)-H(29A) | 0.9800   | C(40)-H(40)       | 1.0000     |
| C(29)-H(29B) | 0.9800   | C(41)-H(41A)      | 0.9800     |
| C(29)-H(29C) | 0.9800   | C(41)-H(41B)      | 0.9800     |
| C(30)-H(30A) | 0.9800   | C(41)-H(41C)      | 0.9800     |
| C(30)-H(30B) | 0.9800   | C(42)-H(42A)      | 0.9800     |
| C(30)-H(30C) | 0.9800   | C(42)-H(42B)      | 0.9800     |
| C(31)-C(33)  | 1.525(4) | C(42)-H(42C)      | 0.9800     |
| C(31)-C(32)  | 1.530(4) |                   |            |
| C(31)-H(31)  | 1.0000   | C(1)-Ni(1)-C(12)  | 83.12(12)  |
| C(32)-H(32A) | 0.9800   | C(1)-Ni(1)-C(24)  | 96.04(12)  |
| C(32)-H(32B) | 0.9800   | C(12)-Ni(1)-C(24) | 170.23(12) |
| C(32)-H(32C) | 0.9800   | C(1)-Ni(1)-P(1)   | 123.97(8)  |
| C(33)-H(33A) | 0.9800   | C(12)-Ni(1)-P(1)  | 93.61(9)   |
| C(33)-H(33B) | 0.9800   | C(24)-Ni(1)-P(1)  | 94.91(8)   |
| C(33)-H(33C) | 0.9800   | C(1)-Ni(1)-C(13)  | 98.47(11)  |
| C(34)-C(36)  | 1.527(4) | C(12)-Ni(1)-C(13) | 89.45(11)  |
| C(34)-C(35)  | 1.533(5) | C(24)-Ni(1)-C(13) | 81.04(11)  |
| C(34)-H(34)  | 1.0000   | P(1)-Ni(1)-C(13)  | 137.52(7)  |
| C(35)-H(35A) | 0.9800   | C(1)-Ni(1)-Ni(2)  | 52.42(8)   |
| C(35)-H(35B) | 0.9800   | C(12)-Ni(1)-Ni(2) | 97.33(9)   |
| C(35)-H(35C) | 0.9800   | C(24)-Ni(1)-Ni(2) | 74.73(8)   |
| C(36)-H(36A) | 0.9800   | P(1)-Ni(1)-Ni(2)  | 167.72(3)  |
| C(36)-H(36B) | 0.9800   | C(13)-Ni(1)-Ni(2) | 48.53(7)   |
| C(36)-H(36C) | 0.9800   | C(13)-Ni(2)-C(1)  | 114.87(12) |
| C(37)-C(38)  | 1.489(5) | C(13)-Ni(2)-P(2)  | 100.48(9)  |
| C(37)-C(39)  | 1.536(5) | C(1)-Ni(2)-P(2)   | 140.33(9)  |
| C(37)-H(37)  | 1.0000   | C(13)-Ni(2)-Ni(1) | 64.49(8)   |
| C(38)-H(38A) | 0.9800   | C(1)-Ni(2)-Ni(1)  | 53.73(8)   |
| C(38)-H(38B) | 0.9800   | P(2)-Ni(2)-Ni(1)  | 164.95(3)  |
| C(38)-H(38C) | 0.9800   | C(13)-Ni(2)-C(2)  | 144.19(11) |
| C(39)-H(39A) | 0.9800   | C(1)-Ni(2)-C(2)   | 36.19(11)  |

|                  |            |                   |           |
|------------------|------------|-------------------|-----------|
| P(2)-Ni(2)-C(2)  | 114.75(7)  | C(5)-C(6)-C(1)    | 120.1(3)  |
| Ni(1)-Ni(2)-C(2) | 80.11(7)   | C(5)-C(6)-C(7)    | 126.2(3)  |
| C(28)-P(1)-C(31) | 102.69(14) | C(1)-C(6)-C(7)    | 113.7(2)  |
| C(28)-P(1)-C(25) | 109.53(14) | C(8)-C(7)-C(12)   | 121.3(3)  |
| C(31)-P(1)-C(25) | 103.06(14) | C(8)-C(7)-C(6)    | 124.7(3)  |
| C(28)-P(1)-Ni(1) | 112.11(10) | C(12)-C(7)-C(6)   | 113.9(3)  |
| C(31)-P(1)-Ni(1) | 114.83(10) | C(9)-C(8)-C(7)    | 120.5(3)  |
| C(25)-P(1)-Ni(1) | 113.72(10) | C(9)-C(8)-H(8)    | 119.7     |
| C(34)-P(2)-C(37) | 104.20(16) | C(7)-C(8)-H(8)    | 119.7     |
| C(34)-P(2)-C(40) | 103.92(15) | C(10)-C(9)-C(8)   | 119.1(3)  |
| C(37)-P(2)-C(40) | 111.10(17) | C(10)-C(9)-H(9)   | 120.5     |
| C(34)-P(2)-Ni(2) | 108.99(10) | C(8)-C(9)-H(9)    | 120.5     |
| C(37)-P(2)-Ni(2) | 110.37(12) | C(9)-C(10)-C(11)  | 120.5(3)  |
| C(40)-P(2)-Ni(2) | 117.24(11) | C(9)-C(10)-H(10)  | 119.7     |
| C(2)-C(1)-C(6)   | 117.8(3)   | C(11)-C(10)-H(10) | 119.7     |
| C(2)-C(1)-Ni(2)  | 89.45(19)  | C(10)-C(11)-C(12) | 122.0(3)  |
| C(6)-C(1)-Ni(2)  | 118.1(2)   | C(10)-C(11)-H(11) | 119.0     |
| C(2)-C(1)-Ni(1)  | 127.9(2)   | C(12)-C(11)-H(11) | 119.0     |
| C(6)-C(1)-Ni(1)  | 113.6(2)   | C(11)-C(12)-C(7)  | 116.6(3)  |
| Ni(2)-C(1)-Ni(1) | 73.85(10)  | C(11)-C(12)-Ni(1) | 128.6(2)  |
| C(3)-C(2)-C(1)   | 120.8(3)   | C(7)-C(12)-Ni(1)  | 114.6(2)  |
| C(3)-C(2)-Ni(2)  | 132.1(2)   | C(14)-C(13)-C(18) | 117.2(3)  |
| C(1)-C(2)-Ni(2)  | 54.36(15)  | C(14)-C(13)-Ni(2) | 123.7(2)  |
| C(3)-C(2)-H(2)   | 119.6      | C(18)-C(13)-Ni(2) | 118.1(2)  |
| C(1)-C(2)-H(2)   | 119.6      | C(14)-C(13)-Ni(1) | 121.2(2)  |
| Ni(2)-C(2)-H(2)  | 84.9       | C(18)-C(13)-Ni(1) | 91.61(18) |
| C(4)-C(3)-C(2)   | 120.4(3)   | Ni(2)-C(13)-Ni(1) | 66.98(9)  |
| C(4)-C(3)-H(3)   | 119.8      | C(15)-C(14)-C(13) | 121.5(3)  |
| C(2)-C(3)-H(3)   | 119.8      | C(15)-C(14)-H(14) | 119.2     |
| C(3)-C(4)-C(5)   | 120.2(3)   | C(13)-C(14)-H(14) | 119.2     |
| C(3)-C(4)-H(4)   | 119.9      | C(14)-C(15)-C(16) | 120.3(3)  |
| C(5)-C(4)-H(4)   | 119.9      | C(14)-C(15)-H(15) | 119.8     |
| C(6)-C(5)-C(4)   | 120.7(3)   | C(16)-C(15)-H(15) | 119.8     |
| C(6)-C(5)-H(5)   | 119.7      | C(17)-C(16)-C(15) | 119.6(3)  |
| C(4)-C(5)-H(5)   | 119.7      | C(17)-C(16)-H(16) | 120.2     |

|                     |          |                     |          |
|---------------------|----------|---------------------|----------|
| C(15)-C(16)-H(16)   | 120.2    | H(26A)-C(26)-H(26C) | 109.5    |
| C(16)-C(17)-C(18)   | 120.8(3) | H(26B)-C(26)-H(26C) | 109.5    |
| C(16)-C(17)-H(17)   | 119.6    | C(25)-C(27)-H(27A)  | 109.5    |
| C(18)-C(17)-H(17)   | 119.6    | C(25)-C(27)-H(27B)  | 109.5    |
| C(17)-C(18)-C(13)   | 120.5(3) | H(27A)-C(27)-H(27B) | 109.5    |
| C(17)-C(18)-C(19)   | 123.7(3) | C(25)-C(27)-H(27C)  | 109.5    |
| C(13)-C(18)-C(19)   | 115.7(3) | H(27A)-C(27)-H(27C) | 109.5    |
| C(20)-C(19)-C(24)   | 121.7(3) | H(27B)-C(27)-H(27C) | 109.5    |
| C(20)-C(19)-C(18)   | 123.9(3) | C(29)-C(28)-C(30)   | 110.4(3) |
| C(24)-C(19)-C(18)   | 114.3(3) | C(29)-C(28)-P(1)    | 112.8(2) |
| C(21)-C(20)-C(19)   | 120.1(3) | C(30)-C(28)-P(1)    | 116.7(2) |
| C(21)-C(20)-H(20)   | 119.9    | C(29)-C(28)-H(28)   | 105.3    |
| C(19)-C(20)-H(20)   | 119.9    | C(30)-C(28)-H(28)   | 105.3    |
| C(22)-C(21)-C(20)   | 119.1(3) | P(1)-C(28)-H(28)    | 105.3    |
| C(22)-C(21)-H(21)   | 120.4    | C(28)-C(29)-H(29A)  | 109.5    |
| C(20)-C(21)-H(21)   | 120.4    | C(28)-C(29)-H(29B)  | 109.5    |
| C(21)-C(22)-C(23)   | 121.0(3) | H(29A)-C(29)-H(29B) | 109.5    |
| C(21)-C(22)-H(22)   | 119.5    | C(28)-C(29)-H(29C)  | 109.5    |
| C(23)-C(22)-H(22)   | 119.5    | H(29A)-C(29)-H(29C) | 109.5    |
| C(22)-C(23)-C(24)   | 121.7(3) | H(29B)-C(29)-H(29C) | 109.5    |
| C(22)-C(23)-H(23)   | 119.1    | C(28)-C(30)-H(30A)  | 109.5    |
| C(24)-C(23)-H(23)   | 119.1    | C(28)-C(30)-H(30B)  | 109.5    |
| C(23)-C(24)-C(19)   | 116.3(3) | H(30A)-C(30)-H(30B) | 109.5    |
| C(23)-C(24)-Ni(1)   | 134.3(2) | C(28)-C(30)-H(30C)  | 109.5    |
| C(19)-C(24)-Ni(1)   | 109.3(2) | H(30A)-C(30)-H(30C) | 109.5    |
| C(27)-C(25)-C(26)   | 111.0(3) | H(30B)-C(30)-H(30C) | 109.5    |
| C(27)-C(25)-P(1)    | 118.5(2) | C(33)-C(31)-C(32)   | 110.2(3) |
| C(26)-C(25)-P(1)    | 111.8(2) | C(33)-C(31)-P(1)    | 110.5(2) |
| C(27)-C(25)-H(25)   | 104.7    | C(32)-C(31)-P(1)    | 113.4(2) |
| C(26)-C(25)-H(25)   | 104.7    | C(33)-C(31)-H(31)   | 107.5    |
| P(1)-C(25)-H(25)    | 104.7    | C(32)-C(31)-H(31)   | 107.5    |
| C(25)-C(26)-H(26A)  | 109.5    | P(1)-C(31)-H(31)    | 107.5    |
| C(25)-C(26)-H(26B)  | 109.5    | C(31)-C(32)-H(32A)  | 109.5    |
| H(26A)-C(26)-H(26B) | 109.5    | C(31)-C(32)-H(32B)  | 109.5    |
| C(25)-C(26)-H(26C)  | 109.5    | H(32A)-C(32)-H(32B) | 109.5    |

|                     |          |                     |          |
|---------------------|----------|---------------------|----------|
| C(31)-C(32)-H(32C)  | 109.5    | H(36B)-C(36)-H(36C) | 109.5    |
| H(32A)-C(32)-H(32C) | 109.5    | C(38)-C(37)-C(39)   | 113.6(3) |
| H(32B)-C(32)-H(32C) | 109.5    | C(38)-C(37)-P(2)    | 113.7(3) |
| C(31)-C(33)-H(33A)  | 109.5    | C(39)-C(37)-P(2)    | 115.7(2) |
| C(31)-C(33)-H(33B)  | 109.5    | C(38)-C(37)-H(37)   | 104.0    |
| H(33A)-C(33)-H(33B) | 109.5    | C(39)-C(37)-H(37)   | 104.0    |
| C(31)-C(33)-H(33C)  | 109.5    | P(2)-C(37)-H(37)    | 104.0    |
| H(33A)-C(33)-H(33C) | 109.5    | C(41)-C(40)-C(42)   | 110.0(3) |
| H(33B)-C(33)-H(33C) | 109.5    | C(41)-C(40)-P(2)    | 111.4(2) |
| C(36)-C(34)-C(35)   | 109.3(3) | C(42)-C(40)-P(2)    | 117.9(2) |
| C(36)-C(34)-P(2)    | 111.7(2) | C(41)-C(40)-H(40)   | 105.5    |
| C(35)-C(34)-P(2)    | 109.7(2) | C(42)-C(40)-H(40)   | 105.5    |
| C(36)-C(34)-H(34)   | 108.7    | P(2)-C(40)-H(40)    | 105.5    |
| C(35)-C(34)-H(34)   | 108.7    | C(40)-C(41)-H(41A)  | 109.5    |
| P(2)-C(34)-H(34)    | 108.7    | C(40)-C(41)-H(41B)  | 109.5    |
| C(34)-C(35)-H(35A)  | 109.5    | H(41A)-C(41)-H(41B) | 109.5    |
| C(34)-C(35)-H(35B)  | 109.5    | C(40)-C(41)-H(41C)  | 109.5    |
| H(35A)-C(35)-H(35B) | 109.5    | H(41A)-C(41)-H(41C) | 109.5    |
| C(34)-C(35)-H(35C)  | 109.5    | H(41B)-C(41)-H(41C) | 109.5    |
| H(35A)-C(35)-H(35C) | 109.5    | C(40)-C(42)-H(42A)  | 109.5    |
| H(35B)-C(35)-H(35C) | 109.5    | C(40)-C(42)-H(42B)  | 109.5    |
| C(34)-C(36)-H(36A)  | 109.5    | H(42A)-C(42)-H(42B) | 109.5    |
| C(34)-C(36)-H(36B)  | 109.5    | C(40)-C(42)-H(42C)  | 109.5    |
| H(36A)-C(36)-H(36B) | 109.5    | H(42A)-C(42)-H(42C) | 109.5    |
| C(34)-C(36)-H(36C)  | 109.5    | H(42B)-C(42)-H(42C) | 109.5    |
| H(36A)-C(36)-H(36C) | 109.5    |                     |          |

---

Symmetry transformations used to generate equivalent atoms:

**Table S17.** Anisotropic displacement parameters ( $\text{\AA}^2 \times 10^3$ ) for **4<sup>i</sup>-Pr**. The anisotropic displacement factor exponent takes the form:  $-2\pi^2 [ h^2 a^{*2} U^{11} + \dots + 2 h k a^* b^* U^{12} ]$

|       | U <sup>11</sup> | U <sup>22</sup> | U <sup>33</sup> | U <sup>23</sup> | U <sup>13</sup> | U <sup>12</sup> |
|-------|-----------------|-----------------|-----------------|-----------------|-----------------|-----------------|
| Ni(1) | 21(1)           | 22(1)           | 26(1)           | 1(1)            | -7(1)           | -8(1)           |
| Ni(2) | 25(1)           | 22(1)           | 24(1)           | -1(1)           | -6(1)           | -7(1)           |
| P(1)  | 24(1)           | 22(1)           | 27(1)           | 0(1)            | -11(1)          | -7(1)           |
| P(2)  | 27(1)           | 23(1)           | 28(1)           | 0(1)            | -2(1)           | -9(1)           |
| C(1)  | 21(1)           | 26(2)           | 27(2)           | -2(1)           | -7(1)           | -5(1)           |
| C(2)  | 22(2)           | 26(2)           | 27(2)           | -3(1)           | -6(1)           | -3(1)           |
| C(3)  | 33(2)           | 30(2)           | 27(2)           | -3(1)           | -7(1)           | -4(1)           |
| C(4)  | 31(2)           | 34(2)           | 34(2)           | -6(1)           | -15(1)          | -3(1)           |
| C(5)  | 27(2)           | 32(2)           | 40(2)           | -6(1)           | -12(1)          | -9(1)           |
| C(6)  | 24(2)           | 27(2)           | 33(2)           | -4(1)           | -11(1)          | -8(1)           |
| C(7)  | 27(2)           | 29(2)           | 30(2)           | -2(1)           | -7(1)           | -13(1)          |
| C(8)  | 37(2)           | 47(2)           | 42(2)           | 2(2)            | -14(2)          | -25(2)          |
| C(9)  | 43(2)           | 54(2)           | 42(2)           | 2(2)            | -6(2)           | -34(2)          |
| C(10) | 43(2)           | 41(2)           | 32(2)           | 4(1)            | -8(2)           | -23(2)          |
| C(11) | 32(2)           | 33(2)           | 30(2)           | 1(1)            | -8(1)           | -14(1)          |
| C(12) | 27(2)           | 25(2)           | 30(2)           | -4(1)           | -6(1)           | -11(1)          |
| C(13) | 30(2)           | 22(1)           | 25(2)           | 1(1)            | -10(1)          | -9(1)           |
| C(14) | 32(2)           | 28(2)           | 32(2)           | -2(1)           | -8(1)           | -9(1)           |
| C(15) | 41(2)           | 34(2)           | 27(2)           | 0(1)            | -6(1)           | -9(2)           |
| C(16) | 55(2)           | 49(2)           | 31(2)           | -1(2)           | -17(2)          | -20(2)          |
| C(17) | 38(2)           | 44(2)           | 42(2)           | -3(2)           | -19(2)          | -17(2)          |
| C(18) | 29(2)           | 26(2)           | 33(2)           | -3(1)           | -11(1)          | -11(1)          |
| C(19) | 25(2)           | 22(2)           | 39(2)           | -1(1)           | -10(1)          | -7(1)           |
| C(20) | 30(2)           | 34(2)           | 49(2)           | -4(2)           | -15(2)          | -15(1)          |
| C(21) | 26(2)           | 35(2)           | 60(2)           | 2(2)            | -8(2)           | -16(2)          |
| C(22) | 29(2)           | 32(2)           | 43(2)           | 5(2)            | -1(2)           | -12(1)          |
| C(23) | 28(2)           | 25(2)           | 35(2)           | -1(1)           | -6(1)           | -7(1)           |
| C(24) | 22(1)           | 20(1)           | 32(2)           | 1(1)            | -8(1)           | -5(1)           |
| C(25) | 34(2)           | 29(2)           | 38(2)           | 1(1)            | -14(1)          | -13(1)          |
| C(26) | 41(2)           | 34(2)           | 58(2)           | -3(2)           | -26(2)          | -14(2)          |
| C(27) | 54(2)           | 27(2)           | 50(2)           | 5(2)            | -23(2)          | -17(2)          |
| C(28) | 26(2)           | 27(2)           | 32(2)           | 1(1)            | -7(1)           | -8(1)           |
| C(29) | 48(2)           | 47(2)           | 28(2)           | 3(2)            | -12(2)          | -15(2)          |
| C(30) | 35(2)           | 40(2)           | 40(2)           | -10(2)          | -2(2)           | -8(2)           |



|       |       |       |       |        |        |        |
|-------|-------|-------|-------|--------|--------|--------|
| C(31) | 34(2) | 28(2) | 38(2) | 3(1)   | -21(2) | -9(1)  |
| C(32) | 35(2) | 36(2) | 56(2) | 2(2)   | -27(2) | -11(2) |
| C(33) | 52(2) | 47(2) | 39(2) | 8(2)   | -29(2) | -17(2) |
| C(34) | 27(2) | 29(2) | 40(2) | -6(1)  | -4(1)  | -6(1)  |
| C(35) | 31(2) | 50(2) | 59(2) | -2(2)  | 1(2)   | -20(2) |
| C(36) | 41(2) | 44(2) | 57(2) | -7(2)  | -24(2) | -2(2)  |
| C(37) | 40(2) | 37(2) | 49(2) | 9(2)   | -2(2)  | -13(2) |
| C(38) | 44(2) | 43(2) | 59(2) | 4(2)   | 7(2)   | -20(2) |
| C(39) | 45(2) | 30(2) | 66(3) | 12(2)  | -6(2)  | -10(2) |
| C(40) | 49(2) | 29(2) | 35(2) | -4(1)  | -12(2) | -15(2) |
| C(41) | 60(3) | 56(3) | 77(3) | -21(2) | -31(2) | -18(2) |
| C(42) | 60(3) | 44(2) | 42(2) | -13(2) | -2(2)  | -18(2) |

---

#### References:

- (1) Pangborn, A. B.; Giardello, M. A.; Grubbs, R. H.; Rosen, R. K.; Timmers, F. J. *Organometallics* **1996**, *15*, 1518-1520.
- (2) a) W. Neugebauer, A. J. Kos, P. von R. Schleyer, *J. Organomet. Chem.* **1982**, *228*, 107–118; b) T. Schaub, U. Radius, *Tetrahedron Lett.* **2005**, *46*, 8195–8197.
- (3) Krysan, D. J.; Mackenzie, P. B. *J. Org. Chem.* **1990**, *55*, 4229-4230.
- (4) *SMART*, Molecular analysis research tool; Bruker AXS Inc. Madison, WI, **2001**.
- (5) *SAINTPlus*, Data reduction and correction program; Bruker AXS Inc.: Madison, WI, **2001**.
- (6) *SADABS*, An empirical absorption correction program; Bruker AXS Inc.: Madison, WI, **2001**.
- (7) Sheldrick, G. M. *Acta Cryst.* **2008**, *A64*, 112-122.
- (8) Farrugia, L. J. *Journal of Applied Crystallography* **1999**, *32*, 837-838.
- (9) Farrugia, L. J. *J. Appl. Crystallogr.* **1997**, *30* (5, Pt. 1), 565.
- (10) Becke, A. D. *Journal of Chemical Physics* **1993**, *98*, 5648-5652.
- (11) Gaussian 09, Revision A.02, M. J. Frisch, G. W. Trucks, H. B. Schlegel, G. E. Scuseria, M. A. Robb, J. R. Cheeseman, G. Scalmani, V. Barone, B. Mennucci, G. A. Petersson, H. Nakatsuji, M.

Caricato, X. Li, H. P. Hratchian, A. F. Izmaylov, J. Bloino, G. Zheng, J. L. Sonnenberg, M. Hada, M. Ehara, K. Toyota, R. Fukuda, J. Hasegawa, M. Ishida, T. Nakajima, Y. Honda, O. Kitao, H. Nakai, T. Vreven, J. A. Montgomery, Jr., J. E. Peralta, F. Ogliaro, M. Bearpark, J. J. Heyd, E. Brothers, K. N. Kudin, V. N. Staroverov, R. Kobayashi, J. Normand, K. Raghavachari, A. Rendell, J. C. Burant, S. S. Iyengar, J. Tomasi, M. Cossi, N. Rega, J. M. Millam, M. Klene, J. E. Knox, J. B. Cross, V. Bakken, C. Adamo, J. Jaramillo, R. Gomperts, R. E. Stratmann, O. Yazyev, A. J. Austin, R. Cammi, C. Pomelli, J. W. Ochterski, R. L. Martin, K. Morokuma, V. G. Zakrzewski, G. A. Voth, P. Salvador, J. J. Dannenberg, S. Dapprich, A. D. Daniels, O. Farkas, J. B. Foresman, J. V. Ortiz, J. Cioslowski, and D. J. Fox, Gaussian, Inc., Wallingford CT, 2009.

(12) Reich, H. J. *WinDNMR: Dynamic NMR Spectra for Windows*. *J. Chem. Educ.* Software, Series, **1996**.
